# Supplementary material for: The influence of smoking and impaired glucose homoeostasis on the outcome in patients presenting with an acute coronary syndrome: a cross-sectional study
Source: PubMed Central journal article supplement — BMJ Open. 2014 Jul 3;4(7):e005077. doi: 10.1136/bmjopen-2014-005077 (PMC4091510; doi:10.1136/bmjopen-2014-005077), 2014-07-03
Supplement: bmjopen-2014-005077.draft_revisions.pdf [file bmjopen-2014-005077.draft_revisions.pdf]

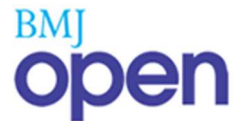

**Smoking and impaired glucose homeostasis predisposes to a more severe outcome in patients presenting with acute coronary syndrome: A cross-sectional study.**

|                                 |                                                                                                                                                                                                                                                                                                                                                                                                                                                                                                                                                                                                                                                                                                                                                                                                 |
|---------------------------------|-------------------------------------------------------------------------------------------------------------------------------------------------------------------------------------------------------------------------------------------------------------------------------------------------------------------------------------------------------------------------------------------------------------------------------------------------------------------------------------------------------------------------------------------------------------------------------------------------------------------------------------------------------------------------------------------------------------------------------------------------------------------------------------------------|
| Journal:                        | <i>BMJ Open</i>                                                                                                                                                                                                                                                                                                                                                                                                                                                                                                                                                                                                                                                                                                                                                                                 |
| Manuscript ID:                  | bmjopen-2014-005077                                                                                                                                                                                                                                                                                                                                                                                                                                                                                                                                                                                                                                                                                                                                                                             |
| Article Type:                   | Research                                                                                                                                                                                                                                                                                                                                                                                                                                                                                                                                                                                                                                                                                                                                                                                        |
| Date Submitted by the Author:   | 17-Feb-2014                                                                                                                                                                                                                                                                                                                                                                                                                                                                                                                                                                                                                                                                                                                                                                                     |
| Complete List of Authors:       | Odeberg, Jacob; Karolinska Institutet and University Hospital, Dept of Medicine; KTH, Science for Life Laboratory, Dept of Proteomics<br>Freitag, Michael; Lund University, Department of Clinical Sciences in Malmö<br>Forssell, Henrik; Blekinge Centre of Competence , ; Blekinge County Hospital, Department of Surgery<br>Vaara, Ivar; Blekinge County Hospital, Department of Laboratory Medicine<br>Persson, Marie-Louise; Blekinge County Hospital, Department of Laboratory Medicine<br>Odeberg, Håkan; Blekinge Centre of Competence,<br>Halling, Anders; University of Southern Denmark, Research Unit of General Practice<br>Råstam, Lennart; Lund University, Department of Clinical Sciences in Malmö<br>Lindblad, Ulf; Lund University, Department of Clinical Sciences in Malmö |
| <b>Primary Subject Heading</b>: | Cardiovascular medicine                                                                                                                                                                                                                                                                                                                                                                                                                                                                                                                                                                                                                                                                                                                                                                         |
| Secondary Subject Heading:      | Emergency medicine, Medical management, Smoking and tobacco                                                                                                                                                                                                                                                                                                                                                                                                                                                                                                                                                                                                                                                                                                                                     |
| Keywords:                       | Myocardial infarction < CARDIOLOGY, Ischaemic heart disease < CARDIOLOGY, Adult cardiology < CARDIOLOGY, Coronary heart disease < CARDIOLOGY                                                                                                                                                                                                                                                                                                                                                                                                                                                                                                                                                                                                                                                    |

SCHOLARONE™  
Manuscripts

1  
2  
3 Smoking and impaired glucose homeostasis predisposes to a more severe  
4 outcome in patients presenting with acute coronary syndrome: A cross-sectional  
5 study.  
6  
7

8  
9  
10 Jacob Odeberg, Michael Freitag, Henrik Forssell, Ivar Vaara, Marie-Louise  
11 Persson, Håkan Odeberg, Anders Halling, Lennart Råstam, Ulf Lindblad.  
12

13  
14 Department of Medicine, Karolinska Institutet and University Hospital, SE 171 76  
15 Stockholm Sweden, and Department of Proteomics, KTH, Science for Life  
16 Laboratory, Stockholm, Sweden Jacob Odeberg Professor  
17

18 Department of Clinical Sciences in Malmö, Lund University, S-20502 Malmö,  
19 Sweden Michael Freitag MD  
20

21 Blekinge Centre of Competence, SE 371 81 Karlskrona, Sweden Henrik Forsell  
22 Associate Professor  
23

24 Blekinge Centre of Competence SE 371 81 Karlskrona, Sweden Håkan Odeberg  
25 Associate Professor  
26

27 Department of Laboratory Medicine, Blekinge County Hospital SE 37185  
28 Karlskrona, Sweden Ivar Vaara Associate Professor  
29

30 Department of Laboratory Medicine, Blekinge County Hospital SE 37185  
31 Karlskrona, Sweden Marie-Louise Persson B.Sci  
32

33 Research Unit of General Practice, University of Southern Denmark, J.B.  
34 Winsløvs Vej 9A, DK-5000 Odense, Denmark Anders Halling Professor  
35

36 Department of Clinical Sciences in Malmö, Lund University, Sweden S-20502  
37 Malmö, Sweden Lennart Råstam Professor  
38

39 Department of Primary Health Care, University of Gothenburg, S-40530  
40 Göteborg, Sweden Ulf Lindblad Professor.  
41

42  
43  
44  
45  
46  
47  
48  
49 Correspondence to: J Odeberg, jacob1@kth.se  
50  
51  
52  
53  
54  
55  
56  
57  
58  
59  
60

## Abstract

**Objectives** Smoking, diabetes, male sex, hypercholesterolemia and hypertension are well-established risk factors for the development of coronary artery disease (CAD). However, less is known about their role in influencing the outcome in the event of acute coronary syndrome (ACS). The aim of this study was to determine if these risk factors are associated specifically with acute myocardial infarction (MI) or unstable angina (UA) in patients with suspected ACS.

**Design** Cross sectional study

**Setting** Patients admitted to the coronary care unit, via the emergency room, at a central county hospital over a four-year period (1992-96).

**Participants** From 5292 patients admitted to the coronary care unit, 908 patients aged 30-74 years were selected, who at discharge had received the diagnosis of either MI (527) or UA (381). A control group consisted of 948 patients aged 30-74 years, where a diagnosis of ACS was excluded.

**Main outcome measures** MI or UA

**Results** Current smoking (OR 2.42 (1.61-3.62)), an impaired glucose homeostasis (OR 1.78 (1.19-2.67)) and male sex (OR 1.71 (1.21-2.40)) were significant factors predisposing to MI over UA, in an event of an ACS. Compared to the non-ACS group, impaired glucose homeostasis, male sex, cholesterol level and age were significantly associated with development of an ACS (both MI and UA). Interestingly, smoking was significantly associated with MI (OR 2.00 (1.32-3.02)), but not UA.

**Conclusions** Smoking, or impaired glucose homeostasis, are acquired risk factors for a severe ACS outcome in CAD patients. Importantly, smoking was not associated with UA, suggesting that it is not a risk factor for all clinical manifestations of CAD, but its influence is important mainly in the acute stages of ACS. Thus, on a diagnosis of CAD the cessation of smoking and management of glucose homeostasis are of upmost importance to avoid severe subsequent ACS consequences.

**What is already known on this subject:**

- Smoking, diabetes mellitus, hypertension, dyslipidemia and male sex are risk factors for the development of atherosclerotic coronary artery disease (CAD)
- The risk factors for the progression of CAD to a more severe acute coronary syndrome (ACS) outcome (myocardial infarction) are less understood.

**What this study adds:**

- Smoking and an impaired glucose homeostasis are risk factors for a more severe ACS outcome.
- The influence of smoking is important mainly in the acute stages of ACS, rather than all clinical manifestations of CAD *per se*.
- On a diagnosis of CAD the cessation of smoking and management of glucose homeostasis are of utmost importance to avoid severe subsequent ACS consequences.

## Strengths and limitations of this study

### Strengths:

- The patients were recruited before the introduction of PCI, CABG and modern antithrombotic drugs in the standard management of ACS. Thus, it was possible to identify progression to UA or MI as distinct outcome groups within the cohort, in the absence of interventions that would otherwise influence the thrombotic processes involved in ACS.
- The control group of non-ACS patients had a similar initial management routine following ER presentation i.e. transfer to a coronary care unit for observation until an ACS diagnosis was excluded, and upon discharge diagnosed as not even suffering from stable CAD.
- The study was based in a single centre with the same two cardiologists evaluating and categorising all 5292 patients, using consistent criteria.

### Limitations:

- Some of the UA cases would likely have been diagnosed as NSTEMI using the most recent criteria of MI.
- Treatments and risk factor profiles have partly evolved since the study was performed.

## Introduction

Smoking, diabetes mellitus, hypertension and dyslipidemia have, together with age and sex, been established as risk factors for the development of atherosclerotic coronary artery disease (CAD). Thus, these are targets for treatment to slow the progression of disease and to reduce the risk of acute coronary syndrome (ACS) consequences, such as myocardial infarction (MI) or unstable angina (UA)<sup>1</sup>. However, the influence of these risk factors on the nature of any CAD-associated ACS is less well understood.

The initiating event of ACS is thought to involve the exposure of a prothrombotic surface, either through atherosclerotic plaque rupture or disruption of the overlying endothelial surface. Resulting thrombosis formation can permanently occlude the lumen of a coronary artery, cause myocardial cell death and the induction of MI. However, in other cases it can be transient, or only partial occlude the vessel, inducing only UA<sup>1</sup>. It is not known why some CAD patients are predisposed to the former, rather than the latter outcome. The thrombogenicity of blood at the time of the acute event is likely to play a role, consistent with the clinical observation that rapid initiation of antithrombotic treatment (e.g. ASA, clopidogrel, fondaparinux) in ACS significantly improved the outcome<sup>2</sup>. However, the role of the established risk factors for the underlying CAD in the ACS outcome has not been well studied. The rationale of the current study was to further clarify this in the Carlsrona Heart Attack Prognosis Study (CHAPS).

CHAPS constitutes a patient cohort recruited before the introduction of percutaneous coronary intervention (PCI), coronary artery bypass graft (CABG) surgery and modern antithrombotic drugs. Thus, to our knowledge, this study is unique in that UA and MI could be identified as distinct groups within an ACS population, and their respective risk factors (diabetes, hyperlipidemia, hypertension, smoking, age and sex) analysed separately.

## Materials and methods:

### *Patient recruitment*

The Carlsrona Heart Attack Prognosis Study (CHAPS) recruited 5292 consecutive patients admitted to the coronary intensive care unit with acute chest pain (indicative of a possible ACS) at Blekinge Hospital, Karlskrona, between January 26, 1992 and January 25, 1996. All included patients gave written informed consent. Of the total of 5292 admissions, 2967 were between 30-74 years of age at admittance. In patients with multiple admittances, only the first classifying admittance was included as case in the study.

### *Acute coronary syndrome patients*

A diagnosis of ACS was ascertained in 908 of the eligible patients aged 30-74 years of age (644 men and 264 women). Two groups were identified: (i) patients experiencing at least one acute MI during the study (527) or (ii) patients experiencing no acute MI, but having at least one episode of UA during the study (381). Data on environmental and lifestyle factors, and blood samples, were collected on first admittance under the classifying diagnosis. The classifying diagnosis was set at discharge by one of two experienced cardiologists.

A diagnosis of acute MI was made when patients fulfilled at least two of the following criteria: (i) A history of chest pain of at least 15 min duration, (ii) an increase in activity of cardiac biomarkers (cardiac enzymes) to at least twice the upper limit of normality, or (iii) characteristic ECG changes for MI (typical sequence change of ST segment and/or of T-waves and/or appearance of new Q-waves). These criteria included both patients with ST-elevation MI (STEMI) and non-ST elevation MI (NSTEMI).

A diagnosis of UA was made when patients fulfilled all of the following criteria: (i) no evidence of MI, (ii) acute chest pain of increased/modified character to any previously experienced, during the preceding 48 h and (iii) angina pectoris diagnosed and medically treated before admission, or alternatively, angina pectoris ascertained by clinical evaluation, including a bicycle exercise test prior to discharge from the hospital. Post-infarction angina and patients with

1  
2  
3 secondary angina were not included.  
4  
5

6  
7 *Non-acute coronary syndrome patients*

8 The study population also contained 948 patients aged 30-74 (569 men and 379  
9 women) who were admitted with suspected ACS, but were subsequently  
10 diagnosed as non-ACS and, furthermore, were not diagnosed with stable  
11 coronary artery disease (CAD).  
12  
13

14  
15  
16  
17 *Ethical approval*

18 Carlsrona Heart Attack Prognosis Study (CHAPS) was approved by the Regional  
19 Ethical Review Board, Lund, Sweden (EPN 2009/762 and LU 298-91).  
20  
21

22  
23  
24 *Risk factors*

25 The presence of CAD risk factors were identified based on laboratory analyses,  
26 patient history and/or medical records. Samples for laboratory analysis were  
27 collected at hospital admission and were analysed by the in-house routine  
28 diagnostic laboratory. Smoking status was defined as current- or non-smoker.  
29 Information on medical history of hypertension and diabetes were recorded at  
30 admission and extracted from earlier medical files, and the diagnosis and  
31 information were also verified at discharge from the hospital. Hypertension was  
32 defined as a physician's diagnosis prior to hospital admittance. In general, these  
33 patients were treated with blood pressure lowering medications. Patients with a  
34 previous diagnosis of diabetes were grouped for analysis as follows: (i) diet  
35 treated only, (ii) oral medication only, or (iii) insulin treated. In parallel, to  
36 identify patients with an impaired glucose homeostasis who had evidence of  
37 both acute and long-term insufficient glucose control, a laboratory-defined  
38 classification based on glucose  $\geq 7.5$  mM together with HbA1c  $\geq 5.5$  was used.  
39  
40  
41  
42  
43  
44  
45  
46  
47  
48  
49

50  
51 *Statistical methods*

52 STATA and IBM SPSS Statistics were used for data analyses. Standard methods  
53 were used for descriptive statistics. Associations between categorical variables  
54 were examined using binary logistic regression and expressed as odds ratios  
55 (OR) with 95% confidence intervals (CI). Principal analyses were made with men  
56  
57  
58  
59  
60



1  
2  
3 and women combined in one group, but were repeated where men and women  
4 were analysed separately. Age was entered into the regressions in 10-year age  
5 groups. Confounding was considered by stratification and by multivariate  
6 regression models forcing age group, sex, impaired glucose homeostasis, serum  
7 cholesterol, hypertension and current smoking into the same model. Individuals  
8 with a missing variable were excluded in the respective analysis. Two-way  
9 interaction terms were used to explore the association of sex and the major risk  
10 factors with ACS outcome.  
11  
12  
13  
14  
15  
16  
17  
18  
19  
20  
21  
22  
23  
24  
25  
26  
27  
28  
29  
30  
31  
32  
33  
34  
35  
36  
37  
38  
39  
40  
41  
42  
43  
44  
45  
46  
47  
48  
49  
50  
51  
52  
53  
54  
55  
56  
57  
58  
59  
60

## Results

### *Patient characteristics*

The CHAPS study recruited 5292 patients of which 2992 were aged 30-74 years of age. Table I shows patient characteristics of the 908 eligible patients with ACS and the 948 eligible patients without ACS, or any current or previous medical history of CAD (non-ACS patients). Among patients with ACS we identified 46 patients (5%) with no previous diagnosis of diabetes as having impaired glucose homeostasis.

### *Risk factors predisposing to myocardial infarction in acute coronary syndrome*

We tested the hypothesis that UA and MI are two separate outcomes in ACS, differently influenced by established risk factors for the underlying CAD. The results are shown in Table II. Current smoking (OR 2.42 (1.61-3.62)), an impaired glucose homeostasis defined as glucose  $\geq 7.5$  mM and HbA1c  $\geq 5.5\%$  (OR 1.78 (1.19-2.67)) and male sex (OR 1.71 (1.21-2.40)) were found to be more strongly associated with MI, compared to UA. The same was true with age, although this was a weaker association (OR 1.02 (1.00-1.04)). Neither cholesterol (total cholesterol level), nor a previous diagnosis of hypertension, was more strongly associated with MI than UA. These data indicate that different CAD risk factors are associated with different ACS outcomes.

### *Risk factors predisposing to myocardial infarction or unstable angina*

Next, we compared the individual subgroups of MI patients or UA patients with non-ACS patients (Table III), to establish the association between the risk factors and the specific ACS outcome. Impaired glucose homeostasis, male sex, cholesterol level and age group were significantly associated with both MI and UA, when compared to patients with non-ACS. Interestingly, smoking was significantly associated only with MI (OR 2.00 (1.32-3.02)), but not with UA (OR 0.84 (0.53-1.33)).

We found no statistically significant interactions between sex and any of the major risk factors for CAD in the association with the outcome of ACS. In sex-

1  
2  
3 specific sub-analyses there was no significant difference between the results for  
4 men and women.  
5  
6  
7  
8  
9  
10  
11  
12  
13  
14  
15  
16  
17  
18  
19  
20  
21  
22  
23  
24  
25  
26  
27  
28  
29  
30  
31  
32  
33  
34  
35  
36  
37  
38  
39  
40  
41  
42  
43  
44  
45  
46  
47  
48  
49  
50  
51  
52  
53  
54  
55  
56  
57  
58  
59  
60

For peer review only

## Discussion

In the current study we show that an impaired glucose homeostasis, smoking or male sex, in addition to being known major risk factors for CAD, are associated with a more severe outcome in the case of ACS (i.e. they predispose towards MI, rather than UA). Interestingly, when compared to the non-ACS group, smoking was significantly associated with MI, but not UA, suggesting its effects are mainly important in the determination of the ACS outcome, rather than the development of all clinical manifestations of CAD *per se*.

The major strength, and novelty, of this study is due to the unique nature of the Carlsrona Heart Attack Prognosis Study (CHAPS) patient cohort. The patients were recruited before the introduction of PCI, CABG and modern antithrombotic drugs in the standard management of ACS. The absence of these interventions, that would otherwise influence the thrombotic processes involved in ACS, made it possible to identify progression to UA or MI as distinct outcome groups within the cohort. Furthermore, we were also able to gather information on non-ACS patients who were admitted into the same hospital setting, during the same period. These patients were initially admitted with a suspected ACS diagnosis, but were discharged from the heart intensive unit assessed as not having experienced an ACS, or even suffering from stable CAD. Thus, the non-ACS patients provided an excellent control group, as they had a similar initial management routine following ER presentation i.e. transfer to a coronary care unit for observation until an ACS diagnosis was confirmed or excluded. A major strength of our study is that it was based in a single centre with the same two cardiologists evaluating and categorising all patients, using consistent criteria. This ensured a level of consistency that is not possible when using data from health care registries studies, which rely solely on diagnosis codes based on each treating physicians judgment, and are composed of data from multiple hospitals and collected for other purposes than research<sup>3 4</sup>

1  
2  
3 A number of limitations of the study should be acknowledged. Biochemical  
4 analyses were performed over a period of four years, although the hospital  
5 routine diagnostic laboratory used accredited standardised methods, providing  
6 consistency over time. The definition of MI continues to evolve as refined criteria  
7 and more sensitive and specific biomarkers are implemented. Some of the UA  
8 cases in our study would likely have now been diagnosed as NSTEMI, using  
9 recent criteria required for MI diagnosis <sup>5</sup>. Treatments and risk factor profiles  
10 have also partly developed since the study was performed. However, smoking  
11 remains a major health issue and type 2 diabetes is increasing in the western  
12 society, therefore, the results are still highly relevant for the care of patients with  
13 CAD today.  
14  
15  
16  
17  
18  
19  
20  
21

22  
23 The determining role of thrombotic factors in the outcome of an ACS is  
24 underscored by the success of more aggressive antithrombotic treatment in  
25 recent years <sup>2</sup>. Previously, we have shown, using the CHAPS material, that  
26 genetic variations of thrombotic factors are associated with ACS outcome <sup>6</sup>. We  
27 show here that impaired glucose homeostasis confers an increased risk towards  
28 MI, rather than UA, in an ACS. Diabetes has been associated with both early and  
29 late mortality after presentation with ACS <sup>7</sup> and furthermore non-fasting  
30 elevated blood glucose has been associated with an increased risk of ischemic  
31 heart disease and MI <sup>8</sup>. A reason for a more adverse outcome in a patient with  
32 diabetes and/or impaired glucose homeostasis could be due to a prothrombotic  
33 effect, as also indicated by the more salutary effects of antithrombotic treatment  
34 in patients with diabetes <sup>9</sup>. In the present study we used the laboratory-based  
35 combination of an increased blood level of both glucose and Hb1Ac, to ascertain  
36 an acute, as well as a more longstanding, deregulated glucose homeostasis. Our  
37 finding that 46 of the patients with ACS, but no previously known diabetes,  
38 fulfilled these laboratory-based criteria is in line with previous reports of  
39 unknown diabetes in a significant proportion of patients with acute MI <sup>10</sup>.  
40 Our finding that current smoking is more common in patients with MI than with  
41 UA is supported by data from a recent registry-based longitudinal cohort study  
42 of patients with ACS in the national Swedish quality-of-care register (Riks-HIA) <sup>4</sup>  
43 and in the prospective population based CAREMA cohort study <sup>11</sup>. Interestingly,  
44  
45  
46  
47  
48  
49  
50  
51  
52  
53  
54  
55  
56  
57  
58  
59  
60

1  
2  
3 our finding that smoking was associated with MI, but not UA, when compared to  
4 the non-ACS patients, shows that smoking has a significant effect mainly in the  
5 acute event, possibly through modulation of thrombogenicity at the site of a  
6 ruptured plaque<sup>12</sup>. Previous reports show that the increased risk for MI  
7 associated with smoking decreases rapidly after cessation<sup>12-14</sup>, supporting the  
8 idea that smoking is a critical risk factor in the acute stages of ACS, rather than in  
9 all clinical manifestations of CAD.  
10  
11  
12  
13  
14

15  
16 In conclusion, our study shows that the presence of known major risk factors for  
17 CAD, such as an impaired glucose homeostasis, smoking and male sex are also  
18 significantly associated with a more severe outcome in the case of an ACS. Our  
19 finding that current smoking is strongly associated with MI, but not UA,  
20 emphasises the importance of the clinical practice of encouraging current  
21 smokers with a diagnosis of CAD to quit their smoking habits.  
22  
23  
24  
25  
26  
27

28 The observed differences in ACS outcome associated with smoking or  
29 dysregulated glucose metabolism highlight several hypotheses that warrant  
30 further investigation. Establishing the influence of these risk factors at the  
31 cellular level, e.g. on platelet function, coagulation and/or fibrinolysis,  
32 inflammation and other factors influencing the vessel micro-milieu, could lead to  
33 optimisation of pharmacological treatment for CAD and ACS.  
34  
35  
36  
37  
38  
39  
40  
41  
42  
43  
44  
45  
46  
47  
48  
49  
50  
51  
52  
53  
54  
55  
56  
57  
58  
59  
60

**Footnotes:**

Acknowledgements: We wish to thank Dr Lynn Butler for valuable suggestions and comments on the manuscript. Furthermore, senior cardiology consultant Dr Per-Ola Bengtsson for evaluating and categorising patients included in the study.

**Contributors:**

LR, HO, and MF designed and initiated the original Carlsrona Heart Attack Prognosis Study on which the current study is based.

MF conducted the patient inclusion, reviewed all cases, collected patient information and compiled the data files.

JO, HF, IV, HO, AH, LR, UL conceived and designed the current study.

IV and MP collected and compiled the laboratory data.

HF and UL performed the statistical analyses and compiled the results.

JO, MF, HF, IV, HO, AH, LR, UL interpreted the results.

JO, HO, UL drafted the paper.

MF, HF, IV, LR contributed to critical revision for important intellectual content.

All authors approved the final manuscript.

JO is the guarantor.

**Funding:**

The original CHAPS study was supported by the Blekinge County Council.

JO was funded by a grant from Stockholm County Council.

The funding agencies had no role in the design of the study; in the analysis and interpretation of the data; in the writing of the report; or in the decision to submit the paper for publication.

All authors have completed the ICMJE uniform disclosure form at [www.icmje.org/coi\\_disclosure.pdf](http://www.icmje.org/coi_disclosure.pdf) and declare: no support from any organisation for the submitted work; no financial relationships with any organisations that might have an interest in the submitted work in the previous

1  
2  
3 three years; no other relationships or activities that could appear to have  
4 influenced the submitted work.  
5  
6

7  
8 Data sharing: No additional data available  
9

10  
11 The lead author, Jacob Odeberg, affirms that this manuscript is an honest,  
12 accurate, and transparent account of the study being reported; that no important  
13 aspects of the study have been omitted; and that any discrepancies from the  
14 study as planned (and, if relevant, registered) have been explained.  
15  
16  
17  
18

19  
20 I Jacob Odeberg the Corresponding Author of this article contained within the  
21 original manuscript which includes any diagrams & photographs within and any  
22 related or stand alone film submitted (the Contribution”) has the right to grant  
23 on behalf of all authors and does grant on behalf of all authors, a licence to the  
24 BMJ Publishing Group Ltd and its licencees, to permit this Contribution (if  
25 accepted) to be published in the BMJ and any other BMJ Group products and to  
26 exploit all subsidiary rights, as set out in our licence set out at:  
27  
28  
29  
30

31 [http://www.bmj.com/about-bmj/resources-authors/forms-policies-and-](http://www.bmj.com/about-bmj/resources-authors/forms-policies-and-checklists/copyright-open-access-and-permission-reuse)  
32 [checklists/copyright-open-access-and-permission-reuse.](http://www.bmj.com/about-bmj/resources-authors/forms-policies-and-checklists/copyright-open-access-and-permission-reuse)”  
33  
34  
35  
36  
37  
38  
39  
40  
41  
42  
43  
44  
45  
46  
47  
48  
49  
50  
51  
52  
53  
54  
55  
56  
57  
58  
59  
60



## References

1. Libby P. Molecular and cellular mechanisms of the thrombotic complications of atherosclerosis. *Journal of lipid research* 2009;50 Suppl:S352-7.
2. Yusuf S, Zhao F, Mehta SR, Chrolavicius S, Tognoni G, Fox KK. Effects of clopidogrel in addition to aspirin in patients with acute coronary syndromes without ST-segment elevation. *The New England journal of medicine* 2001;345(7):494-502.
3. Herrett E, Shah AD, Boggon R, Denaxas S, Smeeth L, van Staa T, et al. Completeness and diagnostic validity of recording acute myocardial infarction events in primary care, hospital care, disease registry, and national mortality records: cohort study. *BMJ* 2013;346:f2350.
4. Dudas K, Bjorck L, Jernberg T, Lappas G, Wallentin L, Rosengren A. Differences between acute myocardial infarction and unstable angina: a longitudinal cohort study reporting findings from the Register of Information and Knowledge about Swedish Heart Intensive Care Admissions (RIKS-HIA). *BMJ open* 2013;3(1).
5. Thygesen K, Alpert JS, Jaffe AS, Simoons ML, Chaitman BR, White HD, et al. Third universal definition of myocardial infarction. *European heart journal* 2012;33(20):2551-67.
6. Odeberg J, Freitag M, Odeberg H, Rastam L, Lindblad U. Severity of acute coronary syndrome is predicted by interactions between fibrinogen concentrations and polymorphisms in the GPIIIa and FXIII genes. *Journal of thrombosis and haemostasis : JTH* 2006;4(4):909-12.
7. Marso SP, Safley DM, House JA, Tessoro T, Reid KJ, Spertus JA. Suspected acute coronary syndrome patients with diabetes and normal troponin-I levels are at risk for early and late death: Identification of a new high-risk acute coronary syndrome population. *Diabetes care* 2006;29(8):1931-2.
8. Benn M, Tybjaerg-Hansen A, McCarthy MI, Jensen GB, Grande P, Nordestgaard BG. Nonfasting glucose, ischemic heart disease, and myocardial infarction: a Mendelian randomization study. *Journal of the American College of Cardiology* 2012;59(25):2356-65.
9. Roffi M, Eberli FR. Diabetes and acute coronary syndromes. *Best practice & research. Clinical endocrinology & metabolism* 2009;23(3):305-16.
10. Norhammar A, Tenerz A, Nilsson G, Hamsten A, Efendic S, Ryden L, et al. Glucose metabolism in patients with acute myocardial infarction and no previous diagnosis of diabetes mellitus: a prospective study. *Lancet* 2002;359(9324):2140-4.
11. Merry AH, Boer JM, Schouten LJ, Feskens EJ, Verschuren WM, Gorgels AP, et al. Smoking, alcohol consumption, physical activity, and family history and the risks of acute myocardial infarction and unstable angina pectoris: a prospective cohort study. *BMC cardiovascular disorders* 2011;11:13.
12. Ambrose JA, Barua RS. The pathophysiology of cigarette smoking and cardiovascular disease: an update. *Journal of the American College of Cardiology* 2004;43(10):1731-7.

13. Sargent RP, Shepard RM, Glantz SA. Reduced incidence of admissions for myocardial infarction associated with public smoking ban: before and after study. *BMJ* 2004;328(7446):977-80.
14. Mackay DF, Irfan MO, Haw S, Pell JP. Meta-analysis of the effect of comprehensive smoke-free legislation on acute coronary events. *Heart* 2010;96(19):1525-30.

For peer review only

1  
2  
3  
4  
5  
6  
7  
8  
9  
10  
11  
12  
13  
14  
15  
16  
17  
18  
19  
20  
21  
22  
23  
24  
25  
26  
27  
28  
29  
30  
31  
32  
33  
34  
35  
36  
37  
38  
39  
40  
41  
42  
43  
44  
45  
46  
47  
48  
49  
50  
51  
52  
53  
54  
55  
56  
57  
58  
59  
60

**Table I. Patient characteristics**

|                   | Non-ACS     |             | MI         |            | UA         |            |
|-------------------|-------------|-------------|------------|------------|------------|------------|
|                   | Men         | Women       | Men        | Women      | Men        | Women      |
| Patients          | 569         | 379         | 394        | 133        | 250        | 131        |
| Age               | 57.4 (11.2) | 60.1 (11.2) | 63.3 (8.6) | 65.8 (8.0) | 62.5 (8.7) | 65.1 (8.1) |
| Smoking           | 119 (24.4)  | 48 (14.2)   | 100 (27.0) | 29 (23.2)  | 48 (19.8)  | 14 (11.1)  |
| Hypertension      | 84 (17.0)   | 77 (22.7)   | 101 (26.8) | 32 (25.2)  | 68 (27.9)  | 39 (31.0)  |
| Cholesterol*      | 5.8 (1.4)   | 6.1 (1.4)   | 6.1 (1.3)  | 6.6 (1.5)  | 6.0 (1.1)  | 6.6 (1.3)  |
| Diabetes all      | 29 (5.9)    | 30 (8.8)    | 65 (17.2)  | 28 (21.9)  | 27 (11.1)  | 22 (17.5)  |
| DM (diet)         | 24 (4.9)    | 24 (7.0)    | 48 (12.7)  | 18 (14.1)  | 22 (9.0)   | 13 (10.3)  |
| DM (p.o)          | 2 (0.4)     | 2 (0.6)     | 11 (2.9)   | 7 (5.5)    | 3 (1.2)    | 3 (2.4)    |
| DM (insulin)      | 3 (0.6)     | 4 (1.2)     | 6 (1.6)    | 3 (2.3)    | 2 (0.8)    | 6 (4.8)    |
| Glucos*           | 5.7 (2.6)   | 6.7 (4.6)   | 7.3 (3.8)  | 8.1 (4.1)  | 5.9 (2.3)  | 6.4 (3.3)  |
| HbA1c *           | 4.6 (0.8)   | 5.0 (1.5)   | 5.3 (1.4)  | 5.5 (1.7)  | 5.1 (1.1)  | 5.3 (1.6)  |
| Glucose control** | 6 (4.3)     | 9 (11.4)    | 65 (18.6)  | 33 (30.6)  | 29 (13.3)  | 18 (16.4)  |

Non-acute coronary syndrome (Non-ACS), Myocardial Infarction (MI) and Unstable Angina (UA)

Data are means (SD), or numbers (%). DM (diet) no pharmacological treatment for diabetes, DM (p.o.) oral medication for diabetes, DM (insulin) treatment included insulin

\* Routine laboratory analysis of admission samples.

\*\* Glucose control defined as an impaired glucose homeostasis by HbA1c  $\geq$ 5.5 % + Glucose  $\geq$ 7.5 mM

Missing data Non-ACS (n): age (0), smoking (123), hypertension (114), cholesterol (720), diabetes (115), plasma glucose (715), HbA1c (725), glucose control (731). MI (n): age (0), smoking (31), hypertension (23), cholesterol (57), diabetes (115), plasma glucose (40), HbA1c (62), glucose control (98). UA (n): age (0), smoking (12), hypertension (11), cholesterol (45), diabetes (115), plasma glucose (42), HbA1c (46), glucose control (53).

**Table II: The odds of myocardial infarction (MI) versus unstable angina (UA) in patients with acute coronary syndromes**

|                  | MI versus UA |           |
|------------------|--------------|-----------|
|                  | OR           | CI (95%)  |
| Glucose control* | 1.78         | 1.19-2.67 |
| Age_group**      | 1.02         | 1.00-1.04 |
| Sex (male)       | 1.71         | 1.21-2.40 |
| Cholesterol      | 1.06         | 0.94-1.19 |
| Smoking          | 2.42         | 1.61-3.62 |
| Hypertension     | 0.84         | 0.60-1.18 |

\* Impaired glucose homeostasis (HbA1c $\geq$ 5.5% + blood glucose  $\geq$ 7.5 mM)

\*\*Age groups: 30-39, 40-49, 50-59, 60-69, 70-74 years

Associations were estimated by binary logistic regression and expressed as odds ratios (OR) with 95% confidence intervals (CI (95%)). MI versus UA was the dependent variable and age, sex, serum cholesterol, smoking, hypertension or glucose control were entered as covariates.

**Table III: The odds of myocardial infarction (MI), or unstable angina (UA), versus patients without acute coronary syndrome (non-ACS)**

|                  | MI versus non-ACS |           | UA versus non-ACS |           |
|------------------|-------------------|-----------|-------------------|-----------|
|                  | OR                | CI (95%)  | OR                | CI (95%)  |
| Glucose control* | 4.22              | 2.35-7.56 | 2.14              | 1.15-3.95 |
| Age group**      | 1.06              | 1.04-1.08 | 1.04              | 1.03-1.06 |
| Sex (male)       | 2.44              | 1.68-3.55 | 1.48              | 1.02-2.15 |
| Cholesterol      | 1.17              | 1.03-1.32 | 1.15              | 1.00-1.32 |
| Smoking          | 2.00              | 1.32-3.02 | 0.84              | 0.53-1.33 |
| Hypertension     | 1.06              | 0.71-1.58 | 1.29              | 0.87-1.92 |

\* Impaired glucose homeostasis (HbA1c $\geq$ 5.5% + blood glucose  $\geq$ 7.5 mM)

\*\* Age groups: 30-39, 40-49, 50-59, 60-69, 70-74 years

Associations were estimated by binary logistic regression and expressed as odds ratios (OR) with 95% confidence intervals (CI (95%)). MI and UA were the dependent variables and age, sex, serum cholesterol, smoking, hypertension or glucose control were entered as covariates.

## STROBE Statement—checklist of items that should be included in reports of observational studies

|                                                       | Item No | Recommendation                                                                                                                                                                                                                                                                                                                                                                                                                                                                                                                                                                                                                                                                                                                                  |
|-------------------------------------------------------|---------|-------------------------------------------------------------------------------------------------------------------------------------------------------------------------------------------------------------------------------------------------------------------------------------------------------------------------------------------------------------------------------------------------------------------------------------------------------------------------------------------------------------------------------------------------------------------------------------------------------------------------------------------------------------------------------------------------------------------------------------------------|
| <b>Title and abstract</b>                             | 1       | (a) Indicate the study's design with a commonly used term in the title or the abstract <b>Page 1, 2</b><br>(b) Provide in the abstract an informative and balanced summary of what was done and what was found <b>Page 2</b>                                                                                                                                                                                                                                                                                                                                                                                                                                                                                                                    |
| <b>Introduction</b>                                   |         |                                                                                                                                                                                                                                                                                                                                                                                                                                                                                                                                                                                                                                                                                                                                                 |
| <input type="checkbox"/> Background/rationale         | 2       | Explain the scientific background and rationale for the investigation being reported <b>Page 5</b>                                                                                                                                                                                                                                                                                                                                                                                                                                                                                                                                                                                                                                              |
| <input type="checkbox"/> Objectives                   | 3       | State specific objectives, including any prespecified hypotheses <b>Page 5</b>                                                                                                                                                                                                                                                                                                                                                                                                                                                                                                                                                                                                                                                                  |
| <b>Methods</b>                                        |         |                                                                                                                                                                                                                                                                                                                                                                                                                                                                                                                                                                                                                                                                                                                                                 |
| <input type="checkbox"/> Study design                 | 4       | Present key elements of study design early in the paper <b>Page 6, page 7</b>                                                                                                                                                                                                                                                                                                                                                                                                                                                                                                                                                                                                                                                                   |
| <input type="checkbox"/> Setting                      | 5       | Describe the setting, locations, and relevant dates, including periods of recruitment, exposure, follow-up, and data collection <b>Page 6, page 7</b>                                                                                                                                                                                                                                                                                                                                                                                                                                                                                                                                                                                           |
| <input type="checkbox"/> Participants                 | 6       | (a) <i>Cohort study</i> —Give the eligibility criteria, and the sources and methods of selection of participants. Describe methods of follow-up<br><i>Case-control study</i> —Give the eligibility criteria, and the sources and methods of case ascertainment and control selection. Give the rationale for the choice of cases and controls<br><input type="checkbox"/> <i>Cross-sectional study</i> —Give the eligibility criteria, and the sources and methods of selection of participants <b>Page 6, page 7</b><br>(b) <i>Cohort study</i> —For matched studies, give matching criteria and number of exposed and unexposed<br><i>Case-control study</i> —For matched studies, give matching criteria and the number of controls per case |
| <input type="checkbox"/> Variables                    | 7       | Clearly define all outcomes, exposures, predictors, potential confounders, and effect modifiers. Give diagnostic criteria, if applicable <b>Page 6, page 7</b>                                                                                                                                                                                                                                                                                                                                                                                                                                                                                                                                                                                  |
| <input type="checkbox"/> Data sources/<br>measurement | 8*      | For each variable of interest, give sources of data and details of methods of assessment (measurement). Describe comparability of assessment methods if there is more than one group <b>Page 7, page 8</b>                                                                                                                                                                                                                                                                                                                                                                                                                                                                                                                                      |
| <input type="checkbox"/> Bias                         | 9       | Describe any efforts to address potential sources of bias<br><b><i>No potential sources of bias identified</i></b>                                                                                                                                                                                                                                                                                                                                                                                                                                                                                                                                                                                                                              |
| <input type="checkbox"/> Study size                   | 10      | Explain how the study size was arrived at <b>Page 6, page 7</b>                                                                                                                                                                                                                                                                                                                                                                                                                                                                                                                                                                                                                                                                                 |
| <input type="checkbox"/> Quantitative variables       | 11      | Explain how quantitative variables were handled in the analyses. If applicable, describe which groupings were chosen and why <b>Page 7, page 8</b>                                                                                                                                                                                                                                                                                                                                                                                                                                                                                                                                                                                              |
| <input type="checkbox"/> Statistical methods          | 12      | (a) Describe all statistical methods, including those used to control for confounding <b>Page 8</b><br>(b) Describe any methods used to examine subgroups and interactions <b>Page 8</b><br>(c) Explain how missing data were addressed <b>Page 8</b><br>(d) <i>Cohort study</i> —If applicable, explain how loss to follow-up was addressed<br><i>Case-control study</i> —If applicable, explain how matching of cases and controls was addressed<br><i>Cross-sectional study</i> —If applicable, describe analytical methods taking account of sampling strategy <b>N.A</b><br>(e) Describe any sensitivity analyses <b>N.A</b>                                                                                                               |

**Results**

|                                           |     |                                                                                                                                                                                                                                                                                                                                                                                                                                                                                                                    |
|-------------------------------------------|-----|--------------------------------------------------------------------------------------------------------------------------------------------------------------------------------------------------------------------------------------------------------------------------------------------------------------------------------------------------------------------------------------------------------------------------------------------------------------------------------------------------------------------|
| <input type="checkbox"/> Participants     | 13* | (a) Report numbers of individuals at each stage of study—eg numbers potentially eligible, examined for eligibility, confirmed eligible, included in the study, completing follow-up, and analysed <b>Page 9</b><br>(b) Give reasons for non-participation at each stage <b>Page 9</b><br>(c) Consider use of a flow diagram                                                                                                                                                                                        |
| <input type="checkbox"/> Descriptive data | 14* | (a) Give characteristics of study participants (eg demographic, clinical, social) and information on exposures and potential confounders <b>Page 9 and Table 1</b><br>(b) Indicate number of participants with missing data for each variable of interest <b>Table 1 footnotes</b><br>(c) <i>Cohort study</i> —Summarise follow-up time (eg, average and total amount)                                                                                                                                             |
| <input type="checkbox"/> Outcome data     | 15* | <i>Cohort study</i> —Report numbers of outcome events or summary measures over time<br><i>Case-control study</i> —Report numbers in each exposure category, or summary measures of exposure<br><i>Cross-sectional study</i> —Report numbers of outcome events or summary measures <b>Table 1</b>                                                                                                                                                                                                                   |
| <input type="checkbox"/> Main results     | 16  | (a) Give unadjusted estimates and, if applicable, confounder-adjusted estimates and their precision (eg, 95% confidence interval). Make clear which confounders were adjusted for and why they were included <b>Page 9, page 10 and Table 2, Table 3 footnotes</b><br>(b) Report category boundaries when continuous variables were categorized <b>Table 2 and Table 3 footnote</b><br>(c) If relevant, consider translating estimates of relative risk into absolute risk for a meaningful time period <b>N.A</b> |
| <input type="checkbox"/> Other analyses   | 17  | Report other analyses done—eg analyses of subgroups and interactions, and sensitivity analyses <b>Page 9, page 10</b>                                                                                                                                                                                                                                                                                                                                                                                              |

**Discussion**

|                                           |    |                                                                                                                                                                                                             |
|-------------------------------------------|----|-------------------------------------------------------------------------------------------------------------------------------------------------------------------------------------------------------------|
| <input type="checkbox"/> Key results      | 18 | Summarise key results with reference to study objectives <b>Page 11</b>                                                                                                                                     |
| <input type="checkbox"/> Limitations      | 19 | Discuss limitations of the study, taking into account sources of potential bias or imprecision. Discuss both direction and magnitude of any potential bias <b>Page 12</b>                                   |
| <input type="checkbox"/> Interpretation   | 20 | Give a cautious overall interpretation of results considering objectives, limitations, multiplicity of analyses, results from similar studies, and other relevant evidence <b>Page 11, page 12, page 13</b> |
| <input type="checkbox"/> Generalisability | 21 | Discuss the generalisability (external validity) of the study results <b>Page 13</b>                                                                                                                        |

**Other information**

|                                  |    |                                                                                                                                                                              |
|----------------------------------|----|------------------------------------------------------------------------------------------------------------------------------------------------------------------------------|
| <input type="checkbox"/> Funding | 22 | Give the source of funding and the role of the funders for the present study and, if applicable, for the original study on which the present article is based <b>Page 14</b> |
|----------------------------------|----|------------------------------------------------------------------------------------------------------------------------------------------------------------------------------|

\*Give information separately for cases and controls in case-control studies and, if applicable, for exposed and unexposed groups in cohort and cross-sectional studies.

**Note:** An Explanation and Elaboration article discusses each checklist item and gives methodological background and published examples of transparent reporting. The STROBE checklist is best used in conjunction with this article (freely available on the Web sites of PLoS Medicine at <http://www.plosmedicine.org/>, Annals of Internal Medicine at <http://www.annals.org/>, and Epidemiology at <http://www.epidem.com/>). Information on the STROBE Initiative is available at [www.strobe-statement.org](http://www.strobe-statement.org).

# BMJ Open

## The influence of smoking and impaired glucose homeostasis on the outcome in patients presenting with acute coronary syndrome: a cross sectional study

|                                 |                                                                                                                                                                                                                                                                                                                                                                                                                                                                                                                                                                                                                                                                                                                                                                                                 |
|---------------------------------|-------------------------------------------------------------------------------------------------------------------------------------------------------------------------------------------------------------------------------------------------------------------------------------------------------------------------------------------------------------------------------------------------------------------------------------------------------------------------------------------------------------------------------------------------------------------------------------------------------------------------------------------------------------------------------------------------------------------------------------------------------------------------------------------------|
| Journal:                        | <i>BMJ Open</i>                                                                                                                                                                                                                                                                                                                                                                                                                                                                                                                                                                                                                                                                                                                                                                                 |
| Manuscript ID:                  | bmjopen-2014-005077.R1                                                                                                                                                                                                                                                                                                                                                                                                                                                                                                                                                                                                                                                                                                                                                                          |
| Article Type:                   | Research                                                                                                                                                                                                                                                                                                                                                                                                                                                                                                                                                                                                                                                                                                                                                                                        |
| Date Submitted by the Author:   | 03-Jun-2014                                                                                                                                                                                                                                                                                                                                                                                                                                                                                                                                                                                                                                                                                                                                                                                     |
| Complete List of Authors:       | Odeberg, Jacob; Karolinska Institutet and University Hospital, Dept of Medicine; KTH, Science for Life Laboratory, Dept of Proteomics<br>Freitag, Michael; Lund University, Department of Clinical Sciences in Malmö<br>Forssell, Henrik; Blekinge Centre of Competence , ; Blekinge County Hospital, Department of Surgery<br>Vaara, Ivar; Blekinge County Hospital, Department of Laboratory Medicine<br>Persson, Marie-Louise; Blekinge County Hospital, Department of Laboratory Medicine<br>Odeberg, Håkan; Blekinge Centre of Competence,<br>Halling, Anders; University of Southern Denmark, Research Unit of General Practice<br>Råstam, Lennart; Lund University, Department of Clinical Sciences in Malmö<br>Lindblad, Ulf; Lund University, Department of Clinical Sciences in Malmö |
| <b>Primary Subject Heading</b>: | Cardiovascular medicine                                                                                                                                                                                                                                                                                                                                                                                                                                                                                                                                                                                                                                                                                                                                                                         |
| Secondary Subject Heading:      | Emergency medicine, Medical management, Smoking and tobacco                                                                                                                                                                                                                                                                                                                                                                                                                                                                                                                                                                                                                                                                                                                                     |
| Keywords:                       | Myocardial infarction < CARDIOLOGY, Ischaemic heart disease < CARDIOLOGY, Adult cardiology < CARDIOLOGY, Coronary heart disease < CARDIOLOGY                                                                                                                                                                                                                                                                                                                                                                                                                                                                                                                                                                                                                                                    |

SCHOLARONE™  
Manuscripts



1  
2  
3 The influence of smoking and impaired glucose homeostasis on the outcome in  
4 patients presenting with acute coronary syndrome: a cross sectional study  
5  
6  
7  
8

9  
10 Jacob Odeberg, Michael Freitag, Henrik Forssell, Ivar Vaara, Marie-Louise  
11 Persson, Håkan Odeberg, Anders Halling, Lennart Råstam, Ulf Lindblad.  
12  
13

14 Department of Medicine, Karolinska Institutet and University Hospital, SE 171 76  
15 Stockholm Sweden, and Department of Proteomics, KTH, Science for Life  
16 Laboratory, Stockholm, Sweden Jacob Odeberg Professor  
17  
18

19 Department of Clinical Sciences in Malmö, Lund University, S-20502 Malmö,  
20 Sweden Michael Freitag MD  
21  
22

23 Blekinge Centre of Competence, SE 371 81 Karlskrona, Sweden Henrik Forsell  
24 Associate Professor  
25  
26

27 Blekinge Centre of Competence SE 371 81 Karlskrona, Sweden Håkan Odeberg  
28 Associate Professor  
29  
30

31 Department of Laboratory Medicine, Blekinge County Hospital SE 37185  
32 Karlskrona, Sweden Ivar Vaara Associate Professor  
33  
34

35 Department of Laboratory Medicine, Blekinge County Hospital SE 37185  
36 Karlskrona, Sweden Marie-Louise Persson B.Sci  
37  
38

39 Research Unit of General Practice, University of Southern Denmark, J.B.  
40 Winsløvs Vej 9A, DK-5000 Odense, Denmark Anders Halling Professor  
41  
42

43 Department of Clinical Sciences in Malmö, Lund University, Sweden S-20502  
44 Malmö, Sweden Lennart Råstam Professor  
45  
46

47 Department of Primary Health Care, University of Gothenburg, S-40530  
48 Göteborg, Sweden Ulf Lindblad Professor.  
49  
50

51  
52  
53  
54  
55  
56  
57  
58  
59  
60  
Correspondence to: J Odeberg, [jacob1@kth.se](mailto:jacob1@kth.se)

## Abstract

### Objectives

Smoking, diabetes, male sex, hypercholesterolemia and hypertension are well-established risk factors for the development of coronary artery disease (CAD). However, less is known about their role in influencing the outcome in the event of acute coronary syndrome (ACS). The aim of this study was to determine if these risk factors are associated specifically with acute myocardial infarction (MI) or unstable angina (UA) in patients with suspected ACS

### Design

Cross sectional study

### Setting

Patients admitted to the coronary care unit, via the emergency room, at a central county hospital over a four-year period (1992-96)

### Participants

From 5292 patients admitted to the coronary care unit, 908 patients aged 30-74 years were selected, who at discharge had received the diagnosis of either MI (527) or UA (381). A control group consisted of 948 patients aged 30-74 years, where a diagnosis of ACS was excluded

### Main outcome measures

MI or UA

### Results

Current smoking (OR 2.42 (1.61-3.62)), impaired glucose homeostasis defined as HbA1c $\geq$ 5.5% + blood glucose  $\geq$ 7.5mM (OR 1.78(1.19-2.67)) and male sex (OR 1.71 (1.21-2.40)) were significant factors predisposing to MI over UA, in an event of an ACS. Compared to the non-ACS group, impaired glucose homeostasis, male sex, cholesterol level and age were significantly associated with development of an ACS (both MI and UA). Interestingly, smoking was significantly associated with MI (OR 2.00(1.32-3.02)), but not UA

### Conclusions

Smoking, or impaired glucose homeostasis, are acquired risk factors for a severe ACS outcome in CAD patients. Importantly, smoking was not associated with UA, suggesting that it is not a risk factor for all clinical manifestations of CAD, but its influence is important mainly in the acute stages of ACS. Thus, on a diagnosis of CAD the cessation of smoking and management of glucose homeostasis are of utmost importance to avoid severe subsequent ACS consequences.

**What is already known on this subject:**

- Smoking, diabetes mellitus, hypertension, dyslipidemia and male sex are risk factors for the development of atherosclerotic coronary artery disease (CAD)
- The risk factors for the progression of CAD to a more severe acute coronary syndrome (ACS) outcome (myocardial infarction) are less understood.

**What this study adds:**

- Smoking and an impaired glucose homeostasis are risk factors for a more severe ACS outcome.
- The influence of smoking is important mainly in the acute stages of ACS, rather than all clinical manifestations of CAD *per se*.
- On a diagnosis of CAD the cessation of smoking and management of glucose homeostasis are of utmost importance to avoid severe subsequent ACS consequences.

## Strengths and limitations of this study

### Strengths:

- The patients were recruited before the introduction of PCI, CABG and modern antithrombotic drugs in the standard management of ACS. Thus, it was possible to identify progression to UA or MI as distinct outcome groups within the cohort, in the absence of interventions that would otherwise influence the thrombotic processes involved in ACS.
- The control group of non-ACS patients had a similar initial management routine following presentation to the Emergency Room i.e. transfer to a coronary care unit for observation until an ACS diagnosis was excluded, and upon discharge diagnosed as not even suffering from stable CAD.
- The study was based in a single centre with the same two cardiologists evaluating and categorising all 5292 patients, using consistent criteria.

### Limitations:

- Some of the UA cases would likely have been diagnosed as NSTEMI using the most recent criteria of MI.
- The control group is not representative of the general population
- Treatments and risk factor profiles have partly evolved since the study was performed.

## Introduction

Smoking, diabetes mellitus, hypertension and dyslipidemia have, together with age and sex, been established as risk factors for the development of atherosclerotic coronary artery disease (CAD). Thus, these are targets for treatment to slow the progression of disease and to reduce the risk of acute coronary syndrome (ACS) consequences, such as myocardial infarction (MI) or unstable angina (UA)[1]. However, the influence of these risk factors on the nature of any CAD-associated ACS is less well understood.

The initiating event of ACS is thought to involve the exposure of a prothrombotic surface, either through atherosclerotic plaque rupture or disruption of the overlying endothelial surface. Resulting thrombosis formation can permanently occlude the lumen of a coronary artery, cause myocardial cell death and the induction of MI. However, in other cases it can be transient, or only partial occlude the vessel, inducing only UA[1]. It is not known why some CAD patients are predisposed to the former, rather than the latter outcome. The thrombogenicity of blood at the time of the acute event is likely to play a role, consistent with the clinical observation that rapid initiation of antithrombotic treatment (e.g. ASA, clopidogrel, fondaparinux) in ACS significantly improved the outcome[2]. However, the role of the established risk factors for the underlying CAD in the ACS outcome has not been well studied. The rationale of the current study was to further clarify this in the Carlsrona Heart Attack Prognosis Study (CHAPS).

CHAPS constitutes a patient cohort recruited before the introduction of percutaneous coronary intervention (PCI), coronary artery bypass graft (CABG) surgery and modern antithrombotic drugs. Thus, to our knowledge, this study is unique in that UA and MI could be identified as distinct groups within an ACS population, and their respective risk factors (diabetes, hyperlipidemia, hypertension, smoking, age and sex) analysed separately.

## Materials and methods:

### *Patient recruitment*

The Carlsrona Heart Attack Prognosis Study (CHAPS) recruited 5292 consecutive patients admitted to the coronary intensive care unit with acute chest pain (indicative of a possible ACS) at Blekinge Hospital, Karlskrona, between January 26, 1992 and January 25, 1996. Patients that presented to the Emergency Room (ER) with recent or ongoing chest pain were at this time by routine directly transferred to the coronary intensive care unit. Patients were included after written informed consent. Patients unable to give informed consent because of their medical condition were excluded. Of the total of 5292 patient admissions included, 2992 were between 30-74 years of age at admittance. In patients with multiple admittances, only the first classifying admittance was included as case in the study. The selection of patients for the current study is outlined in figure 1.

### *Acute coronary syndrome patients*

A diagnosis of ACS was ascertained in 908 of the eligible patients aged 30-74 years of age (644 men and 264 women). Two groups were identified: (i) patients experiencing at least one acute MI during the study (527) or (ii) patients experiencing no acute MI, but having at least one episode of UA during the study (381). Data on environmental and lifestyle factors, and blood samples, were collected on first admittance under the classifying diagnosis. The classifying diagnosis was set at discharge by one of two experienced cardiologists.

A diagnosis of acute MI was made when patients fulfilled at least two of the following criteria: (i) A history of chest pain of at least 15 min duration, (ii) an increase in activity of cardiac biomarkers (aspartate amino transferase and/or creatinine kinase) to at least twice the upper limit of normality, or (iii) characteristic ECG changes for MI (typical sequence change of ST segment

1  
2  
3 and/or of T-waves and/or appearance of new Q-waves). These criteria included  
4 both patients with ST-elevation MI (STEMI) and non-ST elevation MI (NSTEMI)  
5 corresponding to ICD 9 code 410  
6  
7  
8

9  
10 A diagnosis of UA was made when patients fulfilled all of the following criteria:  
11 (i) no evidence of MI, (ii) acute chest pain of increased/modified character to any  
12 previously experienced, during the preceding 48 h and (iii) angina pectoris  
13 diagnosed and medically treated before admission, or alternatively, angina  
14 pectoris ascertained by clinical evaluation, including a bicycle exercise test prior  
15 to discharge from the hospital. These patients correspond to ICD 9 code 411.  
16  
17 Post-infarction angina and patients with secondary angina were not included.  
18  
19  
20  
21

22  
23 Patients admitted to the coronary intensive care unit were initially treated with  
24 aspirin, and in case of on-going chest pain, also nitrates and morphine. In cases of  
25 clear diagnosis of ST elevation MI, thrombolysis with streptokinase was given  
26 (194 of 527 patients with MI). Patients with MI diagnosed by cardiac markers  
27 only were not given thrombolysis. At the time of the study, acute coronary artery  
28 intervention was not available at this hospital.  
29  
30  
31  
32  
33

#### 34 35 *Non-acute coronary syndrome patients*

36  
37 The study population also contained 948 patients aged 30-74 (569 men and 379  
38 women) who were admitted with suspected ACS, but were subsequently  
39 diagnosed as non-ACS and, furthermore, were not diagnosed with stable  
40 coronary artery disease (CAD). This group constitute patients with chest  
41 discomfort or chest pain without remaining suspicion of cardiac ischemic origin,  
42 thus excluding ICD 9 codes 410-414. Patients with dyspepsia, lower airway  
43 infection or musculoskeletal origin of chest pain are found in this group,  
44 however in many cases no specific medical condition had been established upon  
45 discharge from the coronary intensive care unit.  
46  
47  
48  
49  
50  
51  
52

#### 53 54 *Ethical approval*

55  
56 Carlsrona Heart Attack Prognosis Study (CHAPS) was approved by the Regional  
57 Ethical Review Board, Lund, Sweden (EPN 2009/762 and LU 298-91).  
58  
59  
60

### *Risk factors*

The presence of CAD risk factors were identified based on laboratory analyses, patient history and/or medical records. Samples for laboratory analysis were collected at hospital admission and were analysed by the in-house routine diagnostic laboratory. Smoking status was defined as current- or non-smoker. Non-smoker included patients who quit smoking >1 month before admission. Information on medical history of hypertension and diabetes were recorded at admission and extracted from earlier medical files, and the diagnosis and information were also verified at discharge from the hospital. Hypertension was defined as a physician's diagnosis prior to hospital admittance. In general, these patients were treated with blood pressure lowering medications. Patients with a previous diagnosis of diabetes were grouped for analysis as follows: (i) diet treated only, (ii) oral medication only, or (iii) insulin treated. In parallel, to identify patients with an impaired glucose homeostasis who had evidence of both acute and long-term insufficient glucose control, a laboratory-defined classification based on glucose  $\geq 7.5$  mM together with HbA1c  $\geq 5.5$  was used. We had previously evaluated this classification by comparing to prior diagnosis of DM, and found that 89% of those treated by diet only, 95% of those treated by oral medication only, and 100% of those treated with insulin were identified as having impaired glucose homeostasis using this classification (unpublished).

### *Statistical methods*

STATA and IBM SPSS Statistics were used for data analyses. Standard methods were used for descriptive statistics. Associations between categorical variables were examined using binary logistic regression and expressed as odds ratios (OR) with 95% confidence intervals (CI). Principal analyses were made with men and women combined in one group, but were repeated where men and women were analysed separately. Age was entered into the regressions in 10-year age groups. Confounding was considered by stratification for final diagnosis (as MI, ACS or not) and by multivariate regression models forcing age group, sex, impaired glucose homeostasis, serum cholesterol, hypertension and current smoking into the same model. Individuals with a missing variable were excluded



1  
2  
3  
4  
5  
6  
7  
8  
9  
10  
11  
12  
13  
14  
15  
16  
17  
18  
19  
20  
21  
22  
23  
24  
25  
26  
27  
28  
29  
30  
31  
32  
33  
34  
35  
36  
37  
38  
39  
40  
41  
42  
43  
44  
45  
46  
47  
48  
49  
50  
51  
52  
53  
54  
55  
56  
57  
58  
59  
60

in the respective analysis. Two-way interaction terms were used to explore the association of sex and the major risk factors with ACS outcome.

For peer review only

## Results

### *Patient characteristics*

The CHAPS study recruited 5292 patients of which 2992 were aged 30-74 years of age. Table I shows patient characteristics of the 908 eligible patients with ACS and the 948 eligible patients without ACS, or any current or previous medical history of CAD (non-ACS patients). Among patients with ACS we identified 46 patients (5%) with no previous diagnosis of diabetes as having impaired glucose homeostasis.

### *Risk factors predisposing to myocardial infarction in acute coronary syndrome*

We tested the hypothesis that UA and MI are two separate outcomes in ACS, differently influenced by established risk factors for the underlying CAD. The results are shown in Table II. Current smoking (OR 2.42 (1.61-3.62)), an impaired glucose homeostasis defined as glucose  $\geq 7.5$  mM and HbA1c  $\geq 5.5\%$  (OR 1.78 (1.19-2.67)) and male sex (OR 1.71 (1.21-2.40)) were found to be more strongly associated with MI, compared to UA. The same was true with age, although this was a weaker association (OR 1.02 (1.00-1.04)). Neither cholesterol (total cholesterol level), nor a previous diagnosis of hypertension, was more strongly associated with MI than UA. These data indicate that different CAD risk factors are associated with different ACS outcomes.

### *Risk factors predisposing to myocardial infarction or unstable angina*

Next, we compared the individual subgroups of MI patients or UA patients with non-ACS patients (Table III), to establish the association between the risk factors and the specific ACS outcome. Impaired glucose homeostasis, male sex, cholesterol level and age group were significantly associated with both MI and UA, when compared to patients with non-ACS. Interestingly, smoking was significantly associated only with MI (OR 2.00 (1.32-3.02)), but not with UA (OR 0.84 (0.53-1.33)).

We found no statistically significant interactions between sex and any of the major risk factors for CAD in the association with the outcome of ACS. In sex-

1  
2  
3  
4  
5  
6  
7  
8  
9  
10  
11  
12  
13  
14  
15  
16  
17  
18  
19  
20  
21  
22  
23  
24  
25  
26  
27  
28  
29  
30  
31  
32  
33  
34  
35  
36  
37  
38  
39  
40  
41  
42  
43  
44  
45  
46  
47  
48  
49  
50  
51  
52  
53  
54  
55  
56  
57  
58  
59  
60

specific sub-analyses there was no significant difference between the results for men and women.

For peer review only

## Discussion

In the current study we show that an impaired glucose homeostasis, smoking or male sex, in addition to being known major risk factors for CAD, are associated with a more severe outcome in the case of ACS (i.e. they predispose towards MI, rather than UA). Interestingly, when compared to the non-ACS group, smoking was significantly associated with MI, but not UA, suggesting its effects are mainly important in the determination of the ACS outcome, rather than the development of all clinical manifestations of CAD *per se*.

The major strength, and novelty, of this study is due to the unique nature of the Carlsrona Heart Attack Prognosis Study (CHAPS) patient cohort. The patients were recruited before the introduction of PCI, CABG and modern antithrombotic drugs in the standard management of ACS. The absence of these interventions, that would otherwise influence the thrombotic processes involved in ACS, made it possible to identify progression to UA or MI as distinct outcome groups within the cohort.

Furthermore, we were also able to gather information on non-ACS patients who were admitted into the same hospital setting, during the same period. These patients were initially admitted with a suspected ACS diagnosis, but were discharged from the heart intensive unit assessed as not having experienced an ACS, or even suffering from stable CAD. Thus, the non-ACS patients provided an excellent control group, as they had a similar initial management routine following Emergency Room (ER) presentation i.e. transfer to a coronary care unit for observation until an ACS diagnosis was confirmed or excluded. A major strength of our study results from it being based in a single centre with the same two cardiologists evaluating and categorising all patients, using consistent criteria, and furthermore consistent management routines. This ensured a level of consistency that is not possible when using data from health care registries studies, which rely solely on diagnosis codes based on each treating physicians

1  
2  
3 judgment, and are composed of data from multiple hospitals and collected for  
4 other purposes than research [3] [4]  
5  
6  
7

8 A number of limitations of the study should be acknowledged. Biochemical  
9 analyses were performed over a period of four years, although the hospital  
10 routine diagnostic laboratory used accredited standardised methods, providing  
11 consistency over time. Data for laboratory analyses were not complete for all  
12 patients. The definition of MI continues to evolve as refined criteria and more  
13 sensitive and specific biomarkers are implemented. Some of the UA cases in our  
14 study would likely have now been diagnosed as NSTEMI, using recent criteria  
15 required for MI diagnosis [5] . The control group is not representative of the  
16 general population as it is enriched for individuals seeking medical attention for  
17 non-coronary conditions presenting with chest pain or discomfort, of which  
18 some may also be associated with smoking (i.e. dyspepsia, bronchitis).  
19 Furthermore, CHAPS is a single centre study, and treatments and risk factor  
20 profiles have also partly developed since the study was performed. The results  
21 would therefore not necessarily be generalised to a broader modern population  
22 although our results are supported by more recent studies as discussed below [4  
23 6]. However, smoking remains a major health issue and type 2 diabetes is  
24 increasing in the western society, therefore, the results are still highly relevant  
25 for the care of patients with CAD today.  
26  
27  
28  
29  
30  
31  
32  
33  
34  
35  
36  
37  
38  
39

40 The determining role of thrombotic factors in the outcome of an ACS is  
41 underscored by the success of more aggressive antithrombotic treatment in  
42 recent years [2]. Previously, we have shown, using the CHAPS material, that  
43 genetic variations of thrombotic factors are associated with ACS outcome [7]. We  
44 show here that impaired glucose homeostasis confers an increased risk towards  
45 MI, rather than UA, in an ACS. Diabetes has been associated with both early and  
46 late mortality after presentation with ACS [8] and furthermore non-fasting  
47 elevated blood glucose has been associated with an increased risk of ischemic  
48 heart disease and MI [9]. A reason for a more adverse outcome in a patient with  
49 diabetes and/or impaired glucose homeostasis could be due to a prothrombotic  
50 effect, as also indicated by the more salutary effects of antithrombotic treatment  
51  
52  
53  
54  
55  
56  
57  
58  
59  
60

1  
2  
3 in patients with diabetes [10]. In the present study we used the laboratory-based  
4 combination of an increased blood level of both glucose and Hb1Ac, to ascertain  
5 an acute, as well as a more longstanding, deregulated glucose homeostasis. Our  
6 finding that 46 of the patients with ACS, but no previously known diabetes,  
7 fulfilled these laboratory-based criteria is in line with previous reports of  
8 unknown diabetes in a significant proportion of patients with acute MI [11].  
9 Our finding that current smoking is more common in patients with MI than with  
10 UA is supported by data from a recent registry-based longitudinal cohort study  
11 of patients with ACS in the national Swedish quality-of-care register (Riks-HIA)  
12 [4] and in the prospective population based CAREMA cohort study [6].  
13 Interestingly, our finding that smoking was associated with MI, but not UA, when  
14 compared to the non-ACS patients, shows that smoking has a significant effect  
15 mainly in the acute event, possibly through modulation of thrombogenicity at the  
16 site of a ruptured plaque [12]. This is supported by the finding of Dudas et al that  
17 smoking was associated with MI but not with extensive CAD in need of a  
18 coronary bypass grafting [13]. Furthermore, Björck et al. found smoking to be  
19 an independent determinant for presenting with STEMI compared with non-  
20 STEMI in 93 416 consecutive patients aged 25 to 84 years and admitted to  
21 hospital between 1996 and 2004 with a first AMI. ([14]. Previous reports show  
22 that the increased risk for MI associated with smoking decreases rapidly after  
23 cessation [12 15 16], supporting the idea that smoking is a critical risk factor in  
24 the acute stages of ACS, rather than in all clinical manifestations of CAD.  
25  
26  
27  
28  
29  
30  
31  
32  
33  
34  
35  
36  
37  
38  
39  
40

41 In conclusion, our study shows that the presence of known major risk factors for  
42 CAD, such as an impaired glucose homeostasis, smoking and male sex are also  
43 significantly associated with a more severe outcome in the case of an ACS. Our  
44 finding that current smoking is strongly associated with MI, but not UA,  
45 emphasises the importance of the clinical practice of encouraging current  
46 smokers with a diagnosis of CAD to quit their smoking habits.  
47  
48  
49  
50  
51

52  
53 The observed differences in ACS outcome associated with smoking or  
54 dysregulated glucose metabolism highlight several hypotheses that warrant  
55 further investigation. Establishing the influence of these risk factors at the  
56  
57  
58  
59  
60

1  
2  
3  
4  
5  
6  
7  
8  
9  
10  
11  
12  
13  
14  
15  
16  
17  
18  
19  
20  
21  
22  
23  
24  
25  
26  
27  
28  
29  
30  
31  
32  
33  
34  
35  
36  
37  
38  
39  
40  
41  
42  
43  
44  
45  
46  
47  
48  
49  
50  
51  
52  
53  
54  
55  
56  
57  
58  
59  
60

cellular level, e.g. on platelet function, coagulation and/or fibrinolysis, inflammation and other factors influencing the vessel micro-milieu, could lead to optimisation of pharmacological treatment for CAD and ACS.

For peer review only

**Footnotes:**

Acknowledgements: We wish to thank Dr Lynn Butler for valuable suggestions and comments on the manuscript. Furthermore, senior cardiology consultant Dr Per-Ola Bengtsson for evaluating and categorising patients included in the study.

**Contributors statement**

LR, HO, and MF designed and initiated the original Carlsrona Heart Attack Prognosis Study on which the current study is based.

MF conducted the patient inclusion, reviewed all cases, collected patient information and compiled the data files.

JO, HF, IV, HO, AH, LR, UL conceived and designed the current study.

IV and MP collected and compiled the laboratory data.

HF and UL performed the statistical analyses and compiled the results.

JO, MF, HF, IV, HO, AH, LR, UL interpreted the results.

JO, HO, UL drafted the paper.

MF, HF, IV, LR contributed to critical revision for important intellectual content.

All authors approved the final manuscript.

JO is the guarantor.

**Competing interests**

All authors have completed the ICMJE uniform disclosure form at [www.icmje.org/coi\\_disclosure.pdf](http://www.icmje.org/coi_disclosure.pdf) and declare: no support from any organisation for the submitted work; no financial relationships with any organisations that might have an interest in the submitted work in the previous three years; no other relationships or activities that could appear to have influenced the submitted work.

**Funding:**

The original CHAPS study was supported by the Blekinge County Council.

JO was funded by a grant from Stockholm County Council.



1  
2  
3 The funding agencies had no role in the design of the study; in the analysis and  
4 interpretation of the data; in the writing of the report; or in the decision to  
5 submit the paper for publication.  
6  
7  
8  
9

10  
11 Data sharing: No additional data available  
12  
13

14  
15 The lead author, Jacob Odeberg, affirms that this manuscript is an honest,  
16 accurate, and transparent account of the study being reported; that no important  
17 aspects of the study have been omitted; and that any discrepancies from the  
18 study as planned (and, if relevant, registered) have been explained.  
19  
20  
21  
22

23  
24 I Jacob Odeberg the Corresponding Author of this article contained within the  
25 original manuscript which includes any diagrams & photographs within and any  
26 related or stand alone film submitted (the Contribution”) has the right to grant  
27 on behalf of all authors and does grant on behalf of all authors, a licence to the  
28 BMJ Publishing Group Ltd and its licencees, to permit this Contribution (if  
29 accepted) to be published in the BMJ and any other BMJ Group products and to  
30 exploit all subsidiary rights, as set out in our licence set out at:  
31  
32  
33  
34

35 [http://www.bmj.com/about-bmj/resources-authors/forms-policies-and-](http://www.bmj.com/about-bmj/resources-authors/forms-policies-and-checklists/copyright-open-access-and-permission-reuse)  
36 [checklists/copyright-open-access-and-permission-reuse.”](http://www.bmj.com/about-bmj/resources-authors/forms-policies-and-checklists/copyright-open-access-and-permission-reuse)  
37  
38  
39  
40  
41  
42  
43  
44  
45  
46  
47  
48  
49  
50  
51  
52  
53  
54  
55  
56  
57  
58  
59  
60

## References

1. Libby P. Molecular and cellular mechanisms of the thrombotic complications of atherosclerosis. *Journal of lipid research* 2009;**50 Suppl**:S352-7 doi: 10.1194/jlr.R800099-JLR200[published Online First: Epub Date]].
2. Yusuf S, Zhao F, Mehta SR, et al. Effects of clopidogrel in addition to aspirin in patients with acute coronary syndromes without ST-segment elevation. *The New England journal of medicine* 2001;**345**(7):494-502 doi: 10.1056/NEJMoa010746[published Online First: Epub Date]].
3. Herrett E, Shah AD, Boggon R, et al. Completeness and diagnostic validity of recording acute myocardial infarction events in primary care, hospital care, disease registry, and national mortality records: cohort study. *BMJ* 2013;**346**:f2350 doi: 10.1136/bmj.f2350[published Online First: Epub Date]].
4. Dudas K, Bjorck L, Jernberg T, et al. Differences between acute myocardial infarction and unstable angina: a longitudinal cohort study reporting findings from the Register of Information and Knowledge about Swedish Heart Intensive Care Admissions (RIKS-HIA). *BMJ open* 2013;**3**(1) doi: 10.1136/bmjopen-2012-002155[published Online First: Epub Date]].
5. Thygesen K, Alpert JS, Jaffe AS, et al. Third universal definition of myocardial infarction. *European heart journal* 2012;**33**(20):2551-67 doi: 10.1093/eurheartj/ehs184[published Online First: Epub Date]].
6. Merry AH, Boer JM, Schouten LJ, et al. Smoking, alcohol consumption, physical activity, and family history and the risks of acute myocardial infarction and unstable angina pectoris: a prospective cohort study. *BMC cardiovascular disorders* 2011;**11**:13 doi: 10.1186/1471-2261-11-13[published Online First: Epub Date]].
7. Odeberg J, Freitag M, Odeberg H, et al. Severity of acute coronary syndrome is predicted by interactions between fibrinogen concentrations and polymorphisms in the GPIIIa and FXIII genes. *Journal of thrombosis and*

- 1  
2  
3 haemostasis : JTH 2006;**4**(4):909-12 doi: 10.1111/j.1538-  
4 7836.2006.01835.x[published Online First: Epub Date]].  
5  
6  
7 8. Marso SP, Safley DM, House JA, et al. Suspected acute coronary syndrome  
8 patients with diabetes and normal troponin-I levels are at risk for early  
9 and late death: Identification of a new high-risk acute coronary syndrome  
10 population. Diabetes care 2006;**29**(8):1931-2 doi: 10.2337/dc06-  
11 0660[published Online First: Epub Date]].  
12  
13 9. Benn M, Tybjaerg-Hansen A, McCarthy MI, et al. Nonfasting glucose, ischemic  
14 heart disease, and myocardial infarction: a Mendelian randomization  
15 study. Journal of the American College of Cardiology 2012;**59**(25):2356-  
16 65 doi: 10.1016/j.jacc.2012.02.043[published Online First: Epub Date]].  
17  
18 10. Roffi M, Eberli FR. Diabetes and acute coronary syndromes. Best practice &  
19 research. Clinical endocrinology & metabolism 2009;**23**(3):305-16 doi:  
20 10.1016/j.beem.2009.01.003[published Online First: Epub Date]].  
21  
22 11. Norhammar A, Tenerz A, Nilsson G, et al. Glucose metabolism in patients with  
23 acute myocardial infarction and no previous diagnosis of diabetes  
24 mellitus: a prospective study. Lancet 2002;**359**(9324):2140-4 doi:  
25 10.1016/S0140-6736(02)09089-X[published Online First: Epub Date]].  
26  
27 12. Ambrose JA, Barua RS. The pathophysiology of cigarette smoking and  
28 cardiovascular disease: an update. Journal of the American College of  
29 Cardiology 2004;**43**(10):1731-7 doi:  
30 10.1016/j.jacc.2003.12.047[published Online First: Epub Date]].  
31  
32 13. Dudas KA, Wilhelmssen L, Rosengren A. Predictors of coronary bypass  
33 grafting in a population of middle-aged men. European journal of  
34 cardiovascular prevention and rehabilitation : official journal of the  
35 European Society of Cardiology, Working Groups on Epidemiology &  
36 Prevention and Cardiac Rehabilitation and Exercise Physiology  
37 2007;**14**(1):122-7 doi: 10.1097/01.hjr.0000209814.82701.3f[published  
38 Online First: Epub Date]].  
39  
40 14. Bjorck L, Rosengren A, Wallentin L, et al. Smoking in relation to ST-segment  
41 elevation acute myocardial infarction: findings from the Register of  
42 Information and Knowledge about Swedish Heart Intensive Care  
43  
44  
45  
46  
47  
48  
49  
50  
51  
52  
53  
54  
55  
56  
57  
58  
59  
60

1  
2  
3 Admissions. Heart 2009;**95**(12):1006-11 doi:

4 10.1136/hrt.2008.153064[published Online First: Epub Date]].

- 5  
6  
7 15. Sargent RP, Shepard RM, Glantz SA. Reduced incidence of admissions for  
8 myocardial infarction associated with public smoking ban: before and  
9 after study. BMJ 2004;**328**(7446):977-80 doi:

10 10.1136/bmj.38055.715683.55[published Online First: Epub Date]].

- 11  
12  
13 16. Mackay DF, Irfan MO, Haw S, et al. Meta-analysis of the effect of  
14 comprehensive smoke-free legislation on acute coronary events. Heart  
15 2010;**96**(19):1525-30 doi: 10.1136/hrt.2010.199026[published Online  
16  
17  
18 First: Epub Date]].  
19

**Table I. Patient characteristics**

|                   | Non-ACS     |             | MI         |            | UA         |            | Number of patients with data |
|-------------------|-------------|-------------|------------|------------|------------|------------|------------------------------|
|                   | Men         | Women       | Men        | Women      | Men        | Women      |                              |
| Patients          | 569         | 379         | 394        | 133        | 250        | 131        | 1856                         |
| Age               | 57.4 (11.2) | 60.1 (11.2) | 63.3 (8.6) | 65.8 (8.0) | 62.5 (8.7) | 65.1 (8.1) | 1856                         |
| Smoking           | 119 (24.4)  | 48 (14.2)   | 100 (27.0) | 29 (23.2)  | 48 (19.8)  | 14 (11.1)  | 166                          |
| Hypertension      | 84 (17.0)   | 77 (22.7)   | 101 (26.8) | 32 (25.2)  | 68 (27.9)  | 39 (31.0)  | 148                          |
| Cholesterol*      | 5.8 (1.4)   | 6.1 (1.4)   | 6.1 (1.3)  | 6.6 (1.5)  | 6.0 (1.1)  | 6.6 (1.3)  | 822                          |
| Diabetes all      | 29 (5.9)    | 30 (8.8)    | 65 (17.2)  | 28 (21.9)  | 27 (11.1)  | 22 (17.5)  | 201                          |
| DM (diet)         | 24 (4.9)    | 24 (7.0)    | 48 (12.7)  | 18 (14.1)  | 22 (9.0)   | 13 (10.3)  | 149                          |
| DM (p.o)          | 2 (0.4)     | 2 (0.6)     | 11 (2.9)   | 7 (5.5)    | 3 (1.2)    | 3 (2.4)    | 28                           |
| DM (insulin)      | 3 (0.6)     | 4 (1.2)     | 6 (1.6)    | 3 (2.3)    | 2 (0.8)    | 6 (4.8)    | 24                           |
| Glucose*          | 5.7 (2.6)   | 6.7 (4.6)   | 7.3 (3.8)  | 8.1 (4.1)  | 5.9 (2.3)  | 6.4 (3.3)  | 797                          |
| HbA1c *           | 4.6 (0.8)   | 5.0 (1.5)   | 5.3 (1.4)  | 5.5 (1.7)  | 5.1 (1.1)  | 5.3 (1.6)  | 833                          |
| Glucose control** | 6 (4.3)     | 9 (11.4)    | 65 (18.6)  | 33 (30.6)  | 29 (13.3)  | 18 (16.4)  | 882                          |

Non-acute coronary syndrome (Non-ACS), Myocardial Infarction (MI) and Unstable Angina (UA)

Data are means (SD), or numbers (%). DM (diet) no pharmacological treatment for diabetes, DM (p.o.) oral medication for diabetes, DM (insulin) treatment included insulin

\* Routine laboratory analysis of admission samples.

\*\* Glucose control defined as an impaired glucose homeostasis by HbA1c  $\geq$ 5.5 % + Glucose  $\geq$ 7.5 mM

**Table II: The odds of myocardial infarction (MI) versus unstable angina (UA) in patients with acute coronary syndromes**

|                  | MI versus UA |           |
|------------------|--------------|-----------|
|                  | OR           | CI (95%)  |
| Glucose control* | 1.78         | 1.19-2.67 |
| Age_group**      | 1.02         | 1.00-1.04 |
| Sex (male)       | 1.71         | 1.21-2.40 |
| Cholesterol      | 1.06         | 0.94-1.19 |
| Smoking          | 2.42         | 1.61-3.62 |
| Hypertension     | 0.84         | 0.60-1.18 |

\* Impaired glucose homeostasis (HbA1c $\geq$ 5.5% + blood glucose  $\geq$ 7.5 mM)

\*\*Age groups: 30-39, 40-49, 50-59, 60-69, 70-74 years

Associations were estimated by binary logistic multivariate regression and expressed as odds ratios (OR) with 95% confidence intervals (CI (95%)). MI versus UA was the dependent variable and age by 10 years age groups, sex, serum cholesterol, smoking, hypertension and glucose control were entered as covariates into the same model that included 742 subjects.

**Table III: The odds of myocardial infarction (MI), or unstable angina (UA), versus patients without acute coronary syndrome (non-ACS)**

|                  | MI versus non-ACS |           | UA versus non-ACS |           |
|------------------|-------------------|-----------|-------------------|-----------|
|                  | OR                | CI (95%)  | OR                | CI (95%)  |
| Glucose control* | 4.22              | 2.35-7.56 | 2.14              | 1.15-3.95 |
| Age group**      | 1.06              | 1.04-1.08 | 1.04              | 1.03-1.06 |
| Sex (male)       | 2.44              | 1.68-3.55 | 1.48              | 1.02-2.15 |
| Cholesterol      | 1.17              | 1.03-1.32 | 1.15              | 1.00-1.32 |
| Smoking          | 2.00              | 1.32-3.02 | 0.84              | 0.53-1.33 |
| Hypertension     | 1.06              | 0.71-1.58 | 1.29              | 0.87-1.92 |

\* Impaired glucose homeostasis (HbA1c $\geq$ 5.5% + blood glucose  $\geq$ 7.5 mM)

\*\* Age groups: 30-39, 40-49, 50-59, 60-69, 70-74 years

Associations were estimated by multivariate binary logistic regression and expressed as odds ratios (OR) with 95% confidence intervals (CI (95%)). MI and UA were the dependent variables and age by 10 year age groups, sex, serum cholesterol, smoking, hypertension and glucose control were entered as covariates into the same model. Number of patients included in final models was 680 (MI versus non-ACS), and 564 (UA versus non-ACS), respectively.

1  
2  
3 Figure legend:  
4  
5

6 Figure 1  
7

8 Flow chart outlining selection of patients for current study. For patients with more than  
9 one hospital admittance during the study, only the first admittance under classifying  
10 one hospital admittance during the study, only the first admittance under classifying  
11 one hospital admittance during the study, only the first admittance under classifying  
12 diagnosis was included in the current study. 1136 of patients  $\geq 30$  and  $< 75$  years were  
13 excluded. These represent either patients with known CAD (stable angina, previous MI,  
14 prior diagnosis of ischemic heart failure, stroke) or patients included with a previous  
15 admission in either the ACS or non-ACS group.  
16  
17  
18  
19  
20  
21  
22  
23  
24  
25  
26  
27  
28  
29  
30  
31  
32  
33  
34  
35  
36  
37  
38  
39  
40  
41  
42  
43  
44  
45  
46  
47  
48  
49  
50  
51  
52  
53  
54  
55  
56  
57  
58  
59  
60



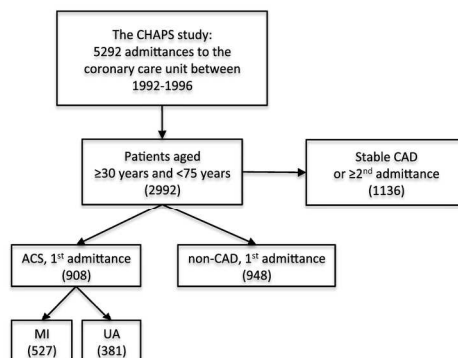

Figure 1

Flow chart outlining selection of patients for current study. For patients with more than one hospital admittance during the study, only the first admittance under classifying diagnosis was included in the current study. 1136 of patients  $\geq 30$  and  $< 75$  years were excluded. These represent either patients with known CAD (stable angina, previous MI, prior diagnosis of ischemic heart failure, stroke) or patients included with a previous admission in either the ACS or non-ACS group.

190x142mm (300 x 300 DPI)

1  
2  
3  
4  
5  
6 The influence of smokingSmoking and impaired glucose homeostasis on  
7 thepredisposes to a more severe outcome in patients presenting with acute  
8 coronary syndrome: aA cross-sectional study.  
9  
10  
11  
12

Formatted: Comment Text

Formatted: English (U.S.)

13  
14 Jacob Odeberg, Michael Freitag, Henrik Forssell, Ivar Vaara, Marie-Louise  
15 Persson, Håkan Odeberg, Anders Halling, Lennart Råstam, Ulf Lindblad.  
16  
17

18 Department of Medicine, Karolinska Institutet and University Hospital, SE 171 76  
19 Stockholm Sweden, and Department of Proteomics, KTH, Science for Life  
20 Laboratory, Stockholm, Sweden Jacob Odeberg Professor  
21 Department of Clinical Sciences in Malmö, Lund University, S-20502 Malmö,  
22 Sweden Michael Freitag MD  
23 Blekinge Centre of Competence, SE 371 81 Karlskrona, Sweden Henrik Forsell  
24 Associate Professor  
25 Blekinge Centre of Competence SE 371 81 Karlskrona, Sweden Håkan Odeberg  
26 Associate Professor  
27 Department of Laboratory Medicine, Blekinge County Hospital SE 37185  
28 Karlskrona, Sweden Ivar Vaara Associate Professor  
29 Department of Laboratory Medicine, Blekinge County Hospital SE 37185  
30 Karlskrona, Sweden Marie-Louise Persson B.Sci  
31 Research Unit of General Practice, University of Southern Denmark, J.B.  
32 Winsløvs Vej 9A, DK-5000 Odense, Denmark Anders Halling Professor  
33 Department of Clinical Sciences in Malmö, Lund University, Sweden S-20502  
34 Malmö, Sweden Lennart Råstam Professor  
35 Department of Primary Health Care, University of Gothenburg, S-40530  
36 Göteborg, Sweden Ulf Lindblad Professor.  
37  
38  
39  
40  
41  
42  
43  
44  
45  
46  
47

48 Correspondence to: J Odeberg, [jacob1@kth.se](mailto:jacob1@kth.se)  
49  
50  
51  
52

Formatted: Font: Times New Roman

Formatted: Font color: Auto

## Abstract

**Objectives** Smoking, diabetes, male sex, hypercholesterolemia and hypertension are well-established risk factors for the development of coronary artery disease (CAD). However, less is known about their role in influencing the outcome in the event of acute coronary syndrome (ACS). The aim of this study was to determine if these risk factors are associated specifically with acute myocardial infarction (MI) or unstable angina (UA) in patients with suspected ACS.

**Design** Cross sectional study

**Setting** Patients admitted to the coronary care unit, via the emergency room, at a central county hospital over a four-year period (1992-96).

**Participants** From 5292 patients admitted to the coronary care unit, 908 patients aged 30-74 years were selected, who at discharge had received the diagnosis of either MI (527) or UA (381). A control group consisted of 948 patients aged 30-74 years, where a diagnosis of ACS was excluded.

**Main outcome measures** MI or UA

**Results** Current smoking (OR 2.42 (1.61-3.62)), an impaired glucose homeostasis **defined as HbA1c $\geq$ 5.5% + blood glucose  $\geq$ 7.5 mM** (OR 1.78 (1.19-2.67)) and male sex (OR 1.71 (1.21-2.40)) were significant factors predisposing to MI over UA, in an event of an ACS. Compared to the non-ACS group, impaired glucose homeostasis, male sex, cholesterol level and age were significantly associated with development of an ACS (both MI and UA). Interestingly, smoking was significantly associated with MI (OR 2.00 (1.32-3.02)), but not UA.

**Conclusions** Smoking, or impaired glucose homeostasis, are acquired risk factors for a severe ACS outcome in CAD patients. Importantly, smoking was not associated with UA, suggesting that it is not a risk factor for all clinical manifestations of CAD, but its influence is important mainly in the acute stages of ACS. Thus, on a diagnosis of CAD the cessation of smoking and management of glucose homeostasis are of utmost importance to avoid severe subsequent ACS consequences.

1  
2  
3  
4  
5  
6  
7 **What is already known on this subject:**  
8

- 9  
10  
11  
12  
13  
14  
15  
16
- Smoking, diabetes mellitus, hypertension, dyslipidemia and male sex are risk factors for the development of atherosclerotic coronary artery disease (CAD)
  - The risk factors for the progression of CAD to a more severe acute coronary syndrome (ACS) outcome (myocardial infarction) are less understood.

17 **What this study adds:**  
18

- 19  
20  
21  
22  
23  
24  
25  
26  
27  
28  
29  
30  
31  
32  
33  
34  
35  
36  
37  
38  
39  
40  
41  
42  
43  
44  
45  
46  
47  
48  
49  
50  
51  
52  
53  
54  
55  
56  
57  
58  
59  
60
- Smoking and an impaired glucose homeostasis are risk factors for a more severe ACS outcome.
  - The influence of smoking is important mainly in the acute stages of ACS, rather than all clinical manifestations of CAD *per se*.
  - On a diagnosis of CAD the cessation of smoking and management of glucose homeostasis are of utmost importance to avoid severe subsequent ACS consequences.

### Strengths and limitations of this study

#### Strengths:

- The patients were recruited before the introduction of PCI, CABG and modern antithrombotic drugs in the standard management of ACS. Thus, it was possible to identify progression to UA or MI as distinct outcome groups within the cohort, in the absence of interventions that would otherwise influence the thrombotic processes involved in ACS.
- The control group of non-ACS patients had a similar initial management routine following ~~ER~~ presentation to the Emergency Room i.e. transfer to a coronary care unit for observation until an ACS diagnosis was excluded, and upon discharge diagnosed as not even suffering from stable CAD.
- The study was based in a single centre with the same two cardiologists evaluating and categorising all 5292 patients, using consistent criteria.

#### Limitations:

- Some of the UA cases would likely have been diagnosed as NSTEMI using the most recent criteria of MI.
- The control group is not representative of the general population
- Treatments and risk factor profiles have partly evolved since the study was performed.

## Introduction

Smoking, diabetes mellitus, hypertension and dyslipidemia have, together with age and sex, been established as risk factors for the development of atherosclerotic coronary artery disease (CAD). Thus, these are targets for treatment to slow the progression of disease and to reduce the risk of acute coronary syndrome (ACS) consequences, such as myocardial infarction (MI) or unstable angina (UA)[1].<sup>1</sup> However, the influence of these risk factors on the nature of any CAD-associated ACS is less well understood.

The initiating event of ACS is thought to involve the exposure of a prothrombotic surface, either through atherosclerotic plaque rupture or disruption of the overlying endothelial surface. Resulting thrombosis formation can permanently occlude the lumen of a coronary artery, cause myocardial cell death and the induction of MI. However, in other cases it can be transient, or only partial occlude the vessel, inducing only UA[1].<sup>1</sup> It is not known why some CAD patients are predisposed to the former, rather than the latter outcome. The thrombogenicity of blood at the time of the acute event is likely to play a role, consistent with the clinical observation that rapid initiation of antithrombotic treatment (e.g. ASA, clopidogrel, fondaparinux) in ACS significantly improved the outcome[2].<sup>2</sup> However, the role of the established risk factors for the underlying CAD in the ACS outcome has not been well studied. The rationale of the current study was to further clarify this in the Carlsrona Heart Attack Prognosis Study (CHAPS).

CHAPS constitutes a patient cohort recruited before the introduction of percutaneous coronary intervention (PCI), coronary artery bypass graft (CABG) surgery and modern antithrombotic drugs. Thus, to our knowledge, this study is unique in that UA and MI could be identified as distinct groups within an ACS population, and their respective risk factors (diabetes, hyperlipidemia, hypertension, smoking, age and sex) analysed separately.

1  
2  
3  
4  
5  
6  
7  
8  
9  
10  
11  
12  
13  
14  
15  
16  
17  
18  
19  
20  
21  
22  
23  
24  
25  
26  
27  
28  
29  
30  
31  
32  
33  
34  
35  
36  
37  
38  
39  
40  
41  
42  
43  
44  
45  
46  
47  
48  
49  
50  
51  
52  
53  
54  
55  
56  
57  
58  
59  
60

|

For peer review only

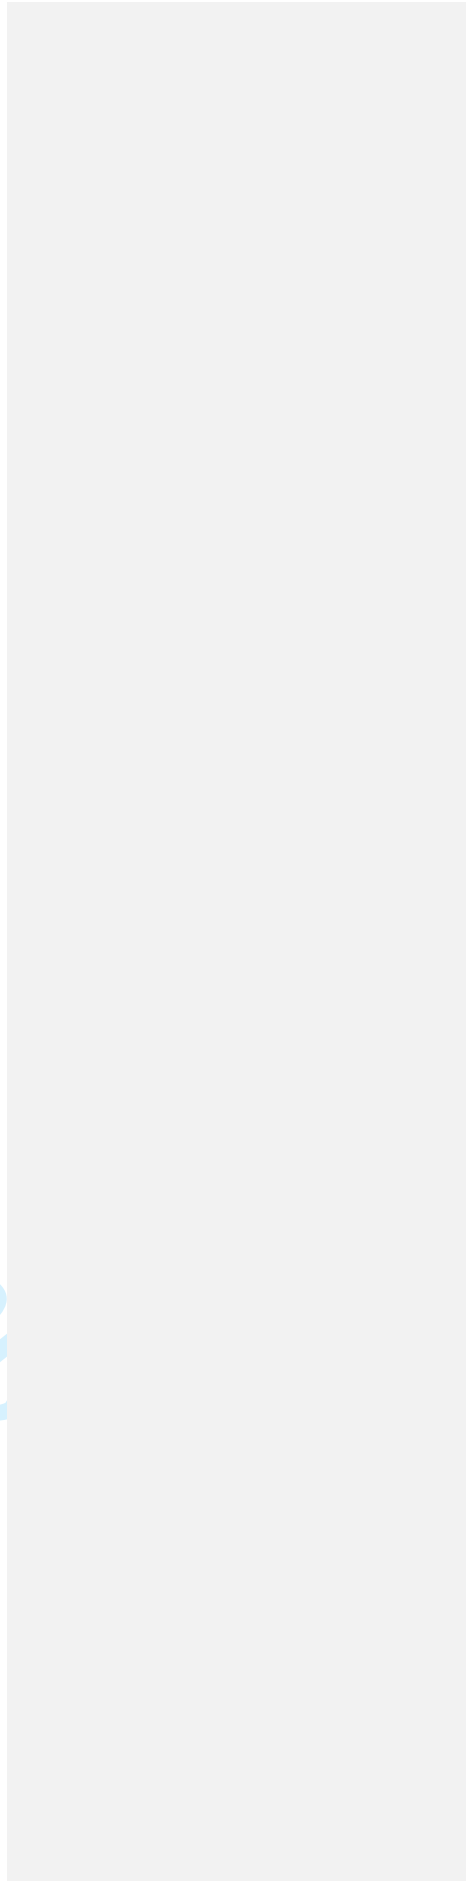

## Materials and methods:

### *Patient recruitment*

The Carlsrona Heart Attack Prognosis Study (CHAPS) recruited 5292 consecutive patients admitted to the coronary intensive care unit with acute chest pain (indicative of a possible ACS) at Blekinge Hospital, Karlskrona, between January 26, 1992 and January 25, 1996. Patients that presented to the Emergency Room (ER) with recent or ongoing chest pain were at this time by routine directly transferred to the coronary intensive care unit. Patients were all included after patients gave written informed consent. Patients unable to give informed consent because of their medical condition were excluded. Of the total of 5292 patient admissions included. 2992-2967 were between 30-74 years of age at admittance. In patients with multiple admittances, only the first classifying admittance was included as case in the study. The selection of patients for the current study is outlined in figure 1,

Formatted: Line spacing: Double

Formatted: Font: Times New Roman, English (U.S.)

Formatted: Font: Times New Roman, English (U.S.)

Formatted: Font: Times New Roman, English (U.S.)

### *Acute coronary syndrome patients*

A diagnosis of ACS was ascertained in 908 of the eligible patients aged 30-74 years of age (644 men and 264 women). Two groups were identified: (i) patients experiencing at least one acute MI during the study (527) or (ii) patients experiencing no acute MI, but having at least one episode of UA during the study (381). Data on environmental and lifestyle factors, and blood samples, were collected on first admittance under the classifying diagnosis. The classifying diagnosis was set at discharge by one of two experienced cardiologists.

A diagnosis of acute MI was made when patients fulfilled at least two of the following criteria: (i) A history of chest pain of at least 15 min duration, (ii) an increase in activity of cardiac biomarkers (aspartate amino transferase and/or creatinine kinase cardiac enzymes) to at least twice the upper limit of normality, or (iii) characteristic ECG changes for MI (typical sequence change of ST segment



1  
2  
3  
4  
5  
6 and/or of T-waves and/or appearance of new Q-waves). These criteria included  
7 both patients with ST-elevation MI (STEMI) and non-ST elevation MI (NSTEMI)  
8 corresponding to ICD 9 code 410).  
9

10  
11  
12 A diagnosis of UA was made when patients fulfilled all of the following criteria:  
13 (i) no evidence of MI, (ii) acute chest pain of increased/modified character to any  
14 previously experienced, during the preceding 48 h and (iii) angina pectoris  
15 diagnosed and medically treated before admission, or alternatively, angina  
16 pectoris ascertained by clinical evaluation, including a bicycle exercise test prior  
17 to discharge from the hospital. These patients correspond to ICD 9 code 411.  
18  
19 Post-infarction angina and patients with secondary angina were not included.  
20  
21

22  
23  
24 Patients admitted to the coronary intensive care unit were initially treated with  
25 aspirin, and in case of on-going chest pain, also nitrates and morphine. In cases of  
26 clear diagnosis of ST elevation MI, thrombolysis with streptokinase was given  
27 (194 of 527 patients with MI). Patients with MI diagnosed by cardiac markers  
28 only were not given thrombolysis. At the time of the study, acute coronary artery  
29 intervention was not available at this hospital.  
30  
31  
32

#### 33 34 35 *Non-acute coronary syndrome patients*

36 The study population also contained 948 patients aged 30-74 (569 men and 379  
37 women) who were admitted with suspected ACS, but were subsequently  
38 diagnosed as non-ACS and, furthermore, were not diagnosed with stable  
39 coronary artery disease (CAD). This group constitute patients with chest  
40 discomfort or chest pain without remaining suspicion of cardiac ischemic origin,  
41 thus excluding ICD 9 codes 410-414. Patients with dyspepsia, lower airway  
42 infection or musculoskeletal origin of chest pain are found in this group,  
43 however in many cases no specific medical condition had been established upon  
44 discharge from the coronary intensive care unit.  
45  
46  
47  
48  
49

#### 50 51 52 *Ethical approval*

53 Carlsrona Heart Attack Prognosis Study (CHAPS) was approved by the Regional  
54 Ethical Review Board, Lund, Sweden (EPN 2009/762 and LU 298-91).  
55  
56  
57

Formatted: Font: Times New Roman

### *Risk factors*

The presence of CAD risk factors were identified based on laboratory analyses, patient history and/or medical records. Samples for laboratory analysis were collected at hospital admission and were analysed by the in-house routine diagnostic laboratory. Smoking status was defined as current- or non-smoker.

Non-smoker included patients who quit smoking >1 month before admission.

Information on medical history of hypertension and diabetes were recorded at admission and extracted from earlier medical files, and the diagnosis and information were also verified at discharge from the hospital. Hypertension was defined as a physician's diagnosis prior to hospital admittance. In general, these patients were treated with blood pressure lowering medications. Patients with a previous diagnosis of diabetes were grouped for analysis as follows: (i) diet treated only, (ii) oral medication only, or (iii) insulin treated. In parallel, to identify patients with an impaired glucose homeostasis who had evidence of both acute and long-term insufficient glucose control, a laboratory-defined classification based on glucose  $\geq 7.5$  mM together with HbA1c  $\geq 5.5$  was used. We had previously evaluated this classification by comparing to prior diagnosis of DM, and found that 89% of those treated by diet only, 95% of those treated by oral medication only, and 100% of those treated with insulin were identified as having impaired glucose homeostasis using this classification (unpublished).

### *Statistical methods*

STATA and IBM SPSS Statistics were used for data analyses. Standard methods were used for descriptive statistics. Associations between categorical variables were examined using binary logistic regression and expressed as odds ratios (OR) with 95% confidence intervals (CI). Principal analyses were made with men and women combined in one group, but were repeated where men and women were analysed separately. Age was entered into the regressions in 10-year age groups. Confounding was considered by stratification for final diagnosis (as MI, ACS or not)), and by multivariate regression models forcing age group, sex, impaired glucose homeostasis, serum cholesterol, hypertension and current smoking into the same model. Individuals with a missing variable were excluded

1  
2  
3  
4  
5  
6  
7  
8  
9  
10  
11  
12  
13  
14  
15  
16  
17  
18  
19  
20  
21  
22  
23  
24  
25  
26  
27  
28  
29  
30  
31  
32  
33  
34  
35  
36  
37  
38  
39  
40  
41  
42  
43  
44  
45  
46  
47  
48  
49  
50  
51  
52  
53  
54  
55  
56  
57  
58  
59  
60

in the respective analysis. Two-way interaction terms were used to explore the association of sex and the major risk factors with ACS outcome.

For peer review only

## Results

### *Patient characteristics*

The CHAPS study recruited 5292 patients of which 2992 were aged 30-74 years of age. Table I shows patient characteristics of the 908 eligible patients with ACS and the 948 eligible patients without ACS, or any current or previous medical history of CAD (non-ACS patients). Among patients with ACS we identified 46 patients (5%) with no previous diagnosis of diabetes as having impaired glucose homeostasis.

### *Risk factors predisposing to myocardial infarction in acute coronary syndrome*

We tested the hypothesis that UA and MI are two separate outcomes in ACS, differently influenced by established risk factors for the underlying CAD. The results are shown in Table II. Current smoking (OR 2.42 (1.61-3.62)), an impaired glucose homeostasis defined as glucose  $\geq 7.5$  mM and HbA1c  $\geq 5.5\%$  (OR 1.78 (1.19-2.67)) and male sex (OR 1.71 (1.21-2.40)) were found to be more strongly associated with MI, compared to UA. The same was true with age, although this was a weaker association (OR 1.02 (1.00-1.04)). Neither cholesterol (total cholesterol level), nor a previous diagnosis of hypertension, was more strongly associated with MI than UA. These data indicate that different CAD risk factors are associated with different ACS outcomes.

Formatted: Font color: Auto

### *Risk factors predisposing to myocardial infarction or unstable angina*

Next, we compared the individual subgroups of MI patients or UA patients with non-ACS patients (Table III), to establish the association between the risk factors and the specific ACS outcome. Impaired glucose homeostasis, male sex, cholesterol level and age group were significantly associated with both MI and UA, when compared to patients with non-ACS. Interestingly, smoking was significantly associated only with MI (OR 2.00 (1.32-3.02)), but not with UA (OR 0.84 (0.53-1.33)).

We found no statistically significant interactions between sex and any of the major risk factors for CAD in the association with the outcome of ACS. In sex-

1  
2  
3  
4  
5  
6  
7  
8  
9  
10  
11  
12  
13  
14  
15  
16  
17  
18  
19  
20  
21  
22  
23  
24  
25  
26  
27  
28  
29  
30  
31  
32  
33  
34  
35  
36  
37  
38  
39  
40  
41  
42  
43  
44  
45  
46  
47  
48  
49  
50  
51  
52  
53  
54  
55  
56  
57  
58  
59  
60

specific sub-analyses there was no significant difference between the results for men and women.

For peer review only

## Discussion

In the current study we show that an impaired glucose homeostasis, smoking or male sex, in addition to being known major risk factors for CAD, are associated with a more severe outcome in the case of ACS (i.e. they predispose towards MI, rather than UA). Interestingly, when compared to the non-ACS group, smoking was significantly associated with MI, but not UA, suggesting its effects are mainly important in the determination of the ACS outcome, rather than the development of all clinical manifestations of CAD *per se*.

The major strength, and novelty, of this study is due to the unique nature of the Carlsrona Heart Attack Prognosis Study (CHAPS) patient cohort. The patients were recruited before the introduction of PCI, CABG and modern antithrombotic drugs in the standard management of ACS. The absence of these interventions, that would otherwise influence the thrombotic processes involved in ACS, made it possible to identify progression to UA or MI as distinct outcome groups within the cohort.

Furthermore, we were also able to gather information on non-ACS patients who were admitted into the same hospital setting, during the same period. These patients were initially admitted with a suspected ACS diagnosis, but were discharged from the heart intensive unit assessed as not having experienced an ACS, or even suffering from stable CAD. Thus, the non-ACS patients provided an excellent control group, as they had a similar initial management routine following **Emergency Room (ER)** presentation i.e. transfer to a coronary care unit for observation until an ACS diagnosis was confirmed or excluded. A major strength of our study **results fromis that it beingwas** based in a single centre with the same two cardiologists evaluating and categorising all patients, using consistent criteria, **and furthermore consistent management routines.** This ensured a level of consistency that is not possible when using data from health care registries studies, which rely solely on diagnosis codes based on each

1  
2  
3  
4  
5  
6 treating physicians judgment, and are composed of data from multiple hospitals  
7 and collected for other purposes than research [3] [4]<sup>3-4</sup>  
8

9  
10 A number of limitations of the study should be acknowledged. Biochemical  
11 analyses were performed over a period of four years, although the hospital  
12 routine diagnostic laboratory used accredited standardised methods, providing  
13 consistency over time. Data for laboratory analyses were not complete for all  
14 patients. The definition of MI continues to evolve as refined criteria and more  
15 sensitive and specific biomarkers are implemented. Some of the UA cases in our  
16 study would likely have now been diagnosed as NSTEMI, using recent criteria  
17 required for MI diagnosis [5]. The control group is not representative of the  
18 general population as it is enriched for individuals seeking medical attention for  
19 non-coronary conditions presenting with chest pain or discomfort, of which  
20 some may also be associated with smoking (i.e. dyspepsia, bronchitis).  
21 Furthermore, CHAPS is a single centre study, and treatments<sup>5</sup>. ~~Treatments~~ and  
22 risk factor profiles have also partly developed since the study was performed.  
23 The results would therefore not necessarily be generalised to a broader modern  
24 population although our results are supported by more recent studies as  
25 discussed below [4 6]. However, smoking remains a major health issue and type  
26 2 diabetes is increasing in the western society, therefore, the results are still  
27 highly relevant for the care of patients with CAD today.  
28  
29

30  
31 The determining role of thrombotic factors in the outcome of an ACS is  
32 underscored by the success of more aggressive antithrombotic treatment in  
33 recent years [2].<sup>2</sup> Previously, we have shown, using the CHAPS material, that  
34 genetic variations of thrombotic factors are associated with ACS outcome [7].<sup>6</sup>  
35 We show here that impaired glucose homeostasis confers an increased risk  
36 towards MI, rather than UA, in an ACS. Diabetes has been associated with both  
37 early and late mortality after presentation with ACS [8]<sup>7</sup> and furthermore non-  
38 fasting elevated blood glucose has been associated with an increased risk of  
39 ischemic heart disease and MI [9].<sup>8</sup> A reason for a more adverse outcome in a  
40 patient with diabetes and/or impaired glucose homeostasis could be due to a  
41 prothrombotic effect, as also indicated by the more salutary effects of  
42  
43  
44  
45  
46  
47  
48  
49  
50  
51  
52  
53  
54  
55  
56  
57  
58  
59  
60

1  
2  
3  
4  
5  
6 antithrombotic treatment in patients with diabetes [10].<sup>9</sup> In the present study  
7 we used the laboratory-based combination of an increased blood level of both  
8 glucose and Hb1Ac, to ascertain an acute, as well as a more longstanding,  
9 deregulated glucose homeostasis. Our finding that 46 of the patients with ACS,  
10 but no previously known diabetes, fulfilled these laboratory-based criteria is in  
11 line with previous reports of unknown diabetes in a significant proportion of  
12 patients with acute MI [11].<sup>10</sup>

13  
14  
15  
16 Our finding that current smoking is more common in patients with MI than with  
17 UA is supported by data from a recent registry-based longitudinal cohort study  
18 of patients with ACS in the national Swedish quality-of-care register (Riks-HIA)  
19 [4]<sup>4</sup> and in the prospective population based CAREMA cohort study [6].<sup>11</sup>

20  
21  
22 Interestingly, our finding that smoking was associated with MI, but not UA, when  
23 compared to the non-ACS patients, shows that smoking has a significant effect  
24 mainly in the acute event, possibly through modulation of thrombogenicity at the  
25 site of a ruptured plaque [12]. This is supported by the finding of Dudas et al that  
26 smoking was associated with MI but not with extensive CAD in need of a  
27 coronary bypass grafting [13]. Furthermore, Björck et al. found smoking to be  
28 an independent determinant for presenting with STEMI compared with non-  
29 STEMI in 93 416 consecutive patients aged 25 to 84 years and admitted to  
30 hospital between 1996 and 2004 with a first AMI. ([14].<sup>12</sup> Previous reports show  
31 that the increased risk for MI associated with smoking decreases rapidly after  
32 cessation [12 15 16].<sup>12-14</sup>, supporting the idea that smoking is a critical risk factor  
33 in the acute stages of ACS, rather than in all clinical manifestations of CAD.

34  
35  
36  
37  
38  
39  
40  
41  
42 In conclusion, our study shows that the presence of known major risk factors for  
43 CAD, such as an impaired glucose homeostasis, smoking and male sex are also  
44 significantly associated with a more severe outcome in the case of an ACS. Our  
45 finding that current smoking is strongly associated with MI, but not UA,  
46 emphasises the importance of the clinical practice of encouraging current  
47 smokers with a diagnosis of CAD to quit their smoking habits.

48  
49  
50  
51  
52  
53  
54  
55  
56  
57  
58  
59  
60  
The observed differences in ACS outcome associated with smoking or  
dysregulated glucose metabolism highlight several hypotheses that warrant



1  
2  
3  
4  
5  
6  
7  
8  
9  
10  
11  
12  
13  
14  
15  
16  
17  
18  
19  
20  
21  
22  
23  
24  
25  
26  
27  
28  
29  
30  
31  
32  
33  
34  
35  
36  
37  
38  
39  
40  
41  
42  
43  
44  
45  
46  
47  
48  
49  
50  
51  
52  
53  
54  
55  
56  
57  
58  
59  
60

further investigation. Establishing the influence of these risk factors at the cellular level, e.g. on platelet function, coagulation and/or fibrinolysis, inflammation and other factors influencing the vessel micro-milieu, could lead to optimisation of pharmacological treatment for CAD and ACS.

For peer review only

**Footnotes:**

Acknowledgements: We wish to thank Dr Lynn Butler for valuable suggestions and comments on the manuscript. Furthermore, senior cardiology consultant Dr Per-Ola Bengtsson for evaluating and categorising patients included in the study.

**Contributor statements:**

LR, HO, and MF designed and initiated the original Carlsrona Heart Attack Prognosis Study on which the current study is based.

MF conducted the patient inclusion, reviewed all cases, collected patient information and compiled the data files.

JO, HF, IV, HO, AH, LR, UL conceived and designed the current study.

IV and MP collected and compiled the laboratory data.

HF and UL performed the statistical analyses and compiled the results.

JO, MF, HF, IV, HO, AH, LR, UL interpreted the results.

JO, HO, UL drafted the paper.

MF, HF, IV, LR contributed to critical revision for important intellectual content.

All authors approved the final manuscript.

JO is the guarantor.

**Competing interests**~~Funding:~~

~~The original CHAPS study was supported by the Blekinge County Council.~~

~~JO was funded by a grant from Stockholm County Council.~~

~~The funding agencies had no role in the design of the study; in the analysis and interpretation of the data; in the writing of the report; or in the decision to submit the paper for publication.~~

All authors have completed the ICMJE uniform disclosure form at

[www.icmje.org/coi\\_disclosure.pdf](http://www.icmje.org/coi_disclosure.pdf) and declare: no support from any

organisation for the submitted work; no financial relationships with any

organisations that might have an interest in the submitted work in the previous

Formatted: Font: Font color: Auto

Formatted: Font: Font color: Auto

1  
2  
3  
4  
5  
6 three years; no other relationships or activities that could appear to have  
7 influenced the submitted work.  
8

9  
10 Funding:

11 The original CHAPS study was supported by the Blekinge County Council.

12 IO was funded by a grant from Stockholm County Council.  
13

14  
15  
16 The funding agencies had no role in the design of the study; in the analysis and  
17 interpretation of the data; in the writing of the report; or in the decision to  
18 submit the paper for publication.  
19  
20  
21  
22  
23

24 Data sharing: No additional data available  
25

26  
27 The lead author, Jacob Odeberg, affirms that this manuscript is an honest,  
28 accurate, and transparent account of the study being reported; that no important  
29 aspects of the study have been omitted; and that any discrepancies from the  
30 study as planned (and, if relevant, registered) have been explained.  
31  
32

33  
34 ▲  
35 I Jacob Odeberg the Corresponding Author of this article contained within the  
36 original manuscript which includes any diagrams & photographs within and any  
37 related or stand alone film submitted (the Contribution”) has the right to grant  
38 on behalf of all authors and does grant on behalf of all authors, a licence to the  
39 BMJ Publishing Group Ltd and its licencees, to permit this Contribution (if  
40 accepted) to be published in the BMJ and any other BMJ Group products and to  
41 exploit all subsidiary rights, as set out in our licence set out at:  
42  
43  
44

45 [http://www.bmj.com/about-bmj/resources-authors/forms-policies-and-](http://www.bmj.com/about-bmj/resources-authors/forms-policies-and-checklists/copyright-open-access-and-permission-reuse)  
46 [checklists/copyright-open-access-and-permission-reuse.”](http://www.bmj.com/about-bmj/resources-authors/forms-policies-and-checklists/copyright-open-access-and-permission-reuse)  
47  
48  
49  
50  
51  
52  
53  
54  
55  
56  
57  
58  
59  
60

Formatted: Font color: Auto

Formatted: Font color: Auto

Formatted: Font color: Auto

## References

1. Libby P. Molecular and cellular mechanisms of the thrombotic complications of atherosclerosis. Journal of lipid research 2009;50 Suppl:S352-7 doi: 10.1194/jlr.R800099-JLR200[published Online First: Epub Date]].
2. Yusuf S, Zhao F, Mehta SR, Chrolavicius S, Tognoni G, Fox KK. Effects of clopidogrel in addition to aspirin in patients with acute coronary syndromes without ST-segment elevation. The New England journal of medicine 2001;345(7):494-502 doi: 10.1056/NEJMoa010746[published Online First: Epub Date]].
3. Herrett E, Shah AD, Boggon R, et al. Completeness and diagnostic validity of recording acute myocardial infarction events in primary care, hospital care, disease registry, and national mortality records: cohort study. BMJ 2013;346:f2350 doi: 10.1136/bmj.f2350[published Online First: Epub Date]].
4. Dudas K, Bjorck L, Jernberg T, Lappas G, Wallentin L, Rosengren A. Differences between acute myocardial infarction and unstable angina: a longitudinal cohort study reporting findings from the Register of Information and Knowledge about Swedish Heart Intensive Care Admissions (RIKS-HIA). BMJ open 2013;3(1) doi: 10.1136/bmjopen-2012-002155[published Online First: Epub Date]].
5. Thygesen K, Alpert JS, Jaffe AS, et al. Third universal definition of myocardial infarction. European heart journal 2012;33(20):2551-67 doi: 10.1093/eurheartj/ehs184[published Online First: Epub Date]].
6. Merry AH, Boer JM, Schouten LJ, et al. Smoking, alcohol consumption, physical activity, and family history and the risks of acute myocardial infarction and unstable angina pectoris: a prospective cohort study. BMC cardiovascular disorders 2011;11:13 doi: 10.1186/1471-2261-11-13[published Online First: Epub Date]].

Formatted: Line spacing: 1.5 lines

- 1  
2  
3  
4  
5  
6  
7 [7. Odeberg J, Freitag M, Odeberg H, Rastam L, Lindblad U. Severity of acute](#)  
8 [coronary syndrome is predicted by interactions between fibrinogen](#)  
9 [concentrations and polymorphisms in the GPIIIa and FXIII genes. \*Journal\*](#)  
10 [of thrombosis and haemostasis](#) : JTH 2006;4(4):909-12 doi:  
11 [10.1111/j.1538-7836.2006.01835.x\[published Online First: Epub Date\]\].](#)
- 12  
13 [8. Marso SP, Safley DM, House JA, Tessendorf T, Reid KJ, Spertus JA. Suspected](#)  
14 [acute coronary syndrome patients with diabetes and normal troponin-I](#)  
15 [levels are at risk for early and late death: Identification of a new high-risk](#)  
16 [acute coronary syndrome population. \*Diabetes care\* 2006;29\(8\):1931-2](#)  
17 [doi: 10.2337/dc06-0660\[published Online First: Epub Date\]\].](#)
- 18  
19  
20  
21 [9. Benn M, Tybjaerg-Hansen A, McCarthy MI, Jensen GB, Grande P, Nordestgaard](#)  
22 [BG. Nonfasting glucose, ischemic heart disease, and myocardial infarction:](#)  
23 [a Mendelian randomization study. \*Journal of the American College of\*](#)  
24 [Cardiology](#) 2012;59(25):2356-65 doi:  
25 [10.1016/j.jacc.2012.02.043\[published Online First: Epub Date\]\].](#)
- 26  
27  
28  
29 [10. Roffi M, Eberli FR. Diabetes and acute coronary syndromes. \*Best practice &\*](#)  
30 [research. \*Clinical endocrinology & metabolism\* 2009;23\(3\):305-16 doi:](#)  
31 [10.1016/j.beem.2009.01.003\[published Online First: Epub Date\]\].](#)
- 32  
33 [11. Norhammar A, Tenerz A, Nilsson G, et al. Glucose metabolism in patients with](#)  
34 [acute myocardial infarction and no previous diagnosis of diabetes](#)  
35 [mellitus: a prospective study. \*Lancet\* 2002;359\(9324\):2140-4 doi:](#)  
36 [10.1016/S0140-6736\(02\)09089-X\[published Online First: Epub Date\]\].](#)
- 37  
38  
39  
40 [12. Ambrose JA, Barua RS. The pathophysiology of cigarette smoking and](#)  
41 [cardiovascular disease: an update. \*Journal of the American College of\*](#)  
42 [Cardiology](#) 2004;43(10):1731-7 doi:  
43 [10.1016/j.jacc.2003.12.047\[published Online First: Epub Date\]\].](#)
- 44  
45  
46  
47 [13. Dudas KA, Wilhelmsen L, Rosengren A. Predictors of coronary bypass](#)  
48 [grafting in a population of middle-aged men. \*European journal of\*](#)  
49 [cardiovascular prevention and rehabilitation](#) : official journal of the  
50 [European Society of Cardiology, Working Groups on Epidemiology &](#)  
51 [Prevention and Cardiac Rehabilitation and Exercise Physiology](#)  
52 [2007;14\(1\):122-7 doi: 10.1097/01.hjr.0000209814.82701.3f\[published](#)  
53 [Online First: Epub Date\]\].](#)
- 54  
55  
56  
57  
58  
59  
60

- 1  
2  
3  
4  
5  
6  
7  
8  
9  
10  
11  
12  
13  
14  
15  
16  
17  
18  
19  
20  
21  
22  
23  
24  
25  
26  
27  
28  
29  
30  
31  
32  
33  
34  
35  
36  
37  
38  
39  
40  
41  
42  
43  
44  
45  
46  
47  
48  
49  
50  
51  
52  
53  
54  
55  
56  
57  
58  
59  
60
14. [Bjorck L, Rosengren A, Wallentin L, Stenestrand U. Smoking in relation to ST-segment elevation acute myocardial infarction: findings from the Register of Information and Knowledge about Swedish Heart Intensive Care Admissions. \*Heart\* 2009;95\(12\):1006-11 doi: 10.1136/hrt.2008.153064\[published Online First: Epub Date\]\].](#)
15. [Sargent RP, Shepard RM, Glantz SA. Reduced incidence of admissions for myocardial infarction associated with public smoking ban: before and after study. \*BMJ\* 2004;328\(7446\):977-80 doi: 10.1136/bmj.38055.715683.55\[published Online First: Epub Date\]\].](#)
16. [Mackay DF, Irfan MO, Haw S, Pell JP. Meta-analysis of the effect of comprehensive smoke-free legislation on acute coronary events. \*Heart\* 2010;96\(19\):1525-30 doi: 10.1136/hrt.2010.199026\[published Online First: Epub Date\]\].](#)
1. Libby P. Molecular and cellular mechanisms of the thrombotic complications of atherosclerosis. *Journal of lipid research* 2009;50 Suppl:S352-7.
2. Yusuf S, Zhao F, Mehta SR, Chrolavicius S, Tognoni G, Fox KK. Effects of clopidogrel in addition to aspirin in patients with acute coronary syndromes without ST-segment elevation. *The New England journal of medicine* 2001;345(7):494-502.
3. Herrett E, Shah AD, Boggon R, Denaxas S, Smeeth L, van Staa T, et al. Completeness and diagnostic validity of recording acute myocardial infarction events in primary care, hospital care, disease registry, and national mortality records: cohort study. *BMJ* 2013;346:f2350.
4. Dudas K, Bjorck L, Jernberg T, Lappas G, Wallentin L, Rosengren A. Differences between acute myocardial infarction and unstable angina: a longitudinal cohort study reporting findings from the Register of Information and Knowledge about Swedish Heart Intensive Care Admissions (RIKS-HIA). *BMJ open* 2013;3(1).
5. Thygesen K, Alpert JS, Jaffe AS, Simoons ML, Chaitman BR, White HD, et al. Third universal definition of myocardial infarction. *European heart journal* 2012;33(20):2551-67.
6. Odeberg J, Freitag M, Odeberg H, Rastam L, Lindblad U. Severity of acute coronary syndrome is predicted by interactions between fibrinogen concentrations and polymorphisms in the GPIIb and FXIII genes. *Journal of thrombosis and haemostasis : JTH* 2006;4(4):909-12.
7. Marso SP, Safley DM, House JA, Tessoroff T, Reid KJ, Spertus JA. Suspected acute coronary syndrome patients with diabetes and normal troponin-I levels are at risk for early and late death: Identification of a new high-risk acute coronary syndrome population. *Diabetes care* 2006;29(8):1931-2.

Formatted: Line spacing: 1.5 lines

8. Benn M, Tybjaerg-Hansen A, McCarthy MI, Jensen GB, Grande P, Nordestgaard BG. Nonfasting glucose, ischemic heart disease, and myocardial infarction: a Mendelian randomization study. *Journal of the American College of Cardiology* 2012;59(25):2356-65.
9. Roffi M, Eberli FR. Diabetes and acute coronary syndromes. *Best practice & research. Clinical endocrinology & metabolism* 2009;23(3):305-16.
10. Norhammar A, Tenerz A, Nilsson G, Hamsten A, Efendic S, Ryden L, et al. Glucose metabolism in patients with acute myocardial infarction and no previous diagnosis of diabetes mellitus: a prospective study. *Lancet* 2002;359(9324):2140-4.
11. Merry AH, Boer JM, Schouten LJ, Feskens EJ, Verschuren WM, Gorgels AP, et al. Smoking, alcohol consumption, physical activity, and family history and the risks of acute myocardial infarction and unstable angina pectoris: a prospective cohort study. *BMC cardiovascular disorders* 2011;11:13.
12. Ambrose JA, Barua RS. The pathophysiology of cigarette smoking and cardiovascular disease: an update. *Journal of the American College of Cardiology* 2004;43(10):1731-7.
13. Sargent RP, Shepard RM, Glantz SA. Reduced incidence of admissions for myocardial infarction associated with public smoking ban: before and after study. *BMJ* 2004;328(7446):977-80.
14. Mackay DF, Irfan MO, Haw S, Pell JP. Meta-analysis of the effect of comprehensive smoke-free legislation on acute coronary events. *Heart* 2010;96(19):1525-30.

Formatted: Line spacing: 1.5 lines

Table I. Patient characteristics

|                   | Non-ACS     |             | MI         |            | UA         |            | Number of patients with |
|-------------------|-------------|-------------|------------|------------|------------|------------|-------------------------|
|                   | Men         | Women       | Men        | Women      | Men        | Women      | data                    |
| Patients          | 569         | 379         | 394        | 133        | 250        | 131        | 1856                    |
| Age               | 57.4 (11.2) | 60.1 (11.2) | 63.3 (8.6) | 65.8 (8.0) | 62.5 (8.7) | 65.1 (8.1) | 1856                    |
| Smoking           | 119 (24.4)  | 48 (14.2)   | 100 (27.0) | 29 (23.2)  | 48 (19.8)  | 14 (11.1)  | 166                     |
| Hypertension      | 84 (17.0)   | 77 (22.7)   | 101 (26.8) | 32 (25.2)  | 68 (27.9)  | 39 (31.0)  | 148                     |
| Cholesterol*      | 5.8 (1.4)   | 6.1 (1.4)   | 6.1 (1.3)  | 6.6 (1.5)  | 6.0 (1.1)  | 6.6 (1.3)  | 822                     |
| Diabetes all      | 29 (5.9)    | 30 (8.8)    | 65 (17.2)  | 28 (21.9)  | 27 (11.1)  | 22 (17.5)  | 201                     |
| DM (diet)         | 24 (4.9)    | 24 (7.0)    | 48 (12.7)  | 18 (14.1)  | 22 (9.0)   | 13 (10.3)  | 149                     |
| DM (p.o)          | 2 (0.4)     | 2 (0.6)     | 11 (2.9)   | 7 (5.5)    | 3 (1.2)    | 3 (2.4)    | 28                      |
| DM (insulin)      | 3 (0.6)     | 4 (1.2)     | 6 (1.6)    | 3 (2.3)    | 2 (0.8)    | 6 (4.8)    | 24                      |
| GlucoseGlucoses*  | 5.7 (2.6)   | 6.7 (4.6)   | 7.3 (3.8)  | 8.1 (4.1)  | 5.9 (2.3)  | 6.4 (3.3)  | 797                     |
| HbA1c *           | 4.6 (0.8)   | 5.0 (1.5)   | 5.3 (1.4)  | 5.5 (1.7)  | 5.1 (1.1)  | 5.3 (1.6)  | 833                     |
| Glucose control** | 6 (4.3)     | 9 (11.4)    | 65 (18.6)  | 33 (30.6)  | 29 (13.3)  | 18 (16.4)  | 882                     |

Non-acute coronary syndrome (Non-ACS), Myocardial Infarction (MI) and Unstable Angina (UA)

Data are means (SD), or numbers (%). DM (diet) no pharmacological treatment for diabetes, DM (p.o.) oral medication for diabetes, DM (insulin) treatment included insulin

\* Routine laboratory analysis of admission samples.

\*\* Glucose control defined as an impaired glucose homeostasis by HbA1c  $\geq 5.5\%$  + Glucose  $\geq 7.5$  mM

~~Missing data Non-ACS (n): age (0), smoking (123), hypertension (114), cholesterol (720), diabetes (115), plasma glucose (715), HbA1c (725), glucose control (731). MI (n): age (0), smoking (31), hypertension (23), cholesterol (57), diabetes (115), plasma glucose (40), HbA1c (62), glucose control (98). UA (n): age (0), smoking (12), hypertension (11), cholesterol (45), diabetes (115), plasma glucose (42), HbA1c (46), glucose control (53).~~

Formatted Table

Inserted Cells

Inserted Cells

Formatted: Strikethrough



**Table II: The odds of myocardial infarction (MI) versus unstable angina (UA) in patients with acute coronary syndromes**

|                  | MI versus UA |           |
|------------------|--------------|-----------|
|                  | OR           | CI (95%)  |
| Glucose control* | 1.78         | 1.19-2.67 |
| Age_group**      | 1.02         | 1.00-1.04 |
| Sex (male)       | 1.71         | 1.21-2.40 |
| Cholesterol      | 1.06         | 0.94-1.19 |
| Smoking          | 2.42         | 1.61-3.62 |
| Hypertension     | 0.84         | 0.60-1.18 |

\* Impaired glucose homeostasis (HbA1c $\geq$ 5.5% + blood glucose  $\geq$ 7.5 mM)

\*\*Age groups: 30-39, 40-49, 50-59, 60-69, 70-74 years

Associations were estimated by binary logistic multivariate regression and expressed as odds ratios (OR) with 95% confidence intervals (CI (95%)). MI versus UA was the dependent variable and age by 10 years age groups, sex, serum cholesterol, smoking, hypertension ~~and~~ glucose control were entered as covariates into the same model that included 742 subjects.

**Table III: The odds of myocardial infarction (MI), or unstable angina (UA), versus patients without acute coronary syndrome (non-ACS)**

|                  | MI versus non-ACS |           | UA versus non-ACS |           |
|------------------|-------------------|-----------|-------------------|-----------|
|                  | OR                | CI (95%)  | OR                | CI (95%)  |
| Glucose control* | 4.22              | 2.35-7.56 | 2.14              | 1.15-3.95 |
| Age group**      | 1.06              | 1.04-1.08 | 1.04              | 1.03-1.06 |
| Sex (male)       | 2.44              | 1.68-3.55 | 1.48              | 1.02-2.15 |
| Cholesterol      | 1.17              | 1.03-1.32 | 1.15              | 1.00-1.32 |
| Smoking          | 2.00              | 1.32-3.02 | 0.84              | 0.53-1.33 |
| Hypertension     | 1.06              | 0.71-1.58 | 1.29              | 0.87-1.92 |

\* Impaired glucose homeostasis (HbA1c $\geq$ 5.5% + blood glucose  $\geq$ 7.5 mM)

\*\* Age groups: 30-39, 40-49, 50-59, 60-69, 70-74 years

Associations were estimated by [multivariate](#) binary logistic regression and expressed as odds ratios (OR) with 95% confidence intervals (CI (95%)). MI and UA were the dependent variables and age [by 10 year age groups](#), sex, serum cholesterol, smoking, hypertension ~~and~~ glucose control were entered as covariates [into the same model](#). [Number of patients included in final models was 680 \(MI versus non-ACS\), and 564 \(UA versus non-ACS\), respectively.](#)

1  
2  
3  
4  
5  
6  
7 Figure legend:  
8  
9

10 Figure 1

11 Flow chart outlining selection of patients for current study. For patients with more than  
12 one hospital admittance during the study, only the first admittance under classifying  
13 diagnosis was included in the current study. 1136 of patients  $\geq 30$  and  $< 75$  years were  
14 excluded. These represent either patients with known CAD (stable angina, previous MI,  
15 prior diagnosis of ischemic heart failure, stroke) or patients included with a previous  
16 admission in either the ACS or non-ACS group.  
17  
18  
19  
20  
21  
22  
23  
24  
25  
26  
27  
28  
29  
30  
31  
32  
33  
34  
35  
36  
37  
38  
39  
40  
41  
42  
43  
44  
45  
46  
47  
48  
49  
50  
51  
52  
53  
54  
55  
56  
57  
58  
59  
60

## STROBE Statement—checklist of items that should be included in reports of observational studies

|                                                  | Item No | Recommendation                                                                                                                                                                                                                                                                                                                                                                                                                                                                                                                                                                                                                                                                                                                                  |
|--------------------------------------------------|---------|-------------------------------------------------------------------------------------------------------------------------------------------------------------------------------------------------------------------------------------------------------------------------------------------------------------------------------------------------------------------------------------------------------------------------------------------------------------------------------------------------------------------------------------------------------------------------------------------------------------------------------------------------------------------------------------------------------------------------------------------------|
| <b>Title and abstract</b>                        | 1       | (a) Indicate the study's design with a commonly used term in the title or the abstract <i>Page 1, 2</i><br>(b) Provide in the abstract an informative and balanced summary of what was done and what was found <i>Page 2</i>                                                                                                                                                                                                                                                                                                                                                                                                                                                                                                                    |
| <b>Introduction</b>                              |         |                                                                                                                                                                                                                                                                                                                                                                                                                                                                                                                                                                                                                                                                                                                                                 |
| Background/rationale                             | 2       | Explain the scientific background and rationale for the investigation being reported <i>Page 5</i>                                                                                                                                                                                                                                                                                                                                                                                                                                                                                                                                                                                                                                              |
| Objectives                                       | 3       | State specific objectives, including any prespecified hypotheses <i>Page 5</i>                                                                                                                                                                                                                                                                                                                                                                                                                                                                                                                                                                                                                                                                  |
| <b>Methods</b>                                   |         |                                                                                                                                                                                                                                                                                                                                                                                                                                                                                                                                                                                                                                                                                                                                                 |
| Study design                                     | 4       | Present key elements of study design early in the paper <i>Page 6, page 7</i>                                                                                                                                                                                                                                                                                                                                                                                                                                                                                                                                                                                                                                                                   |
| Setting                                          | 5       | Describe the setting, locations, and relevant dates, including periods of recruitment, exposure, follow-up, and data collection <i>Page 6, page 7</i>                                                                                                                                                                                                                                                                                                                                                                                                                                                                                                                                                                                           |
| Participants                                     | 6       | (a) <i>Cohort study</i> —Give the eligibility criteria, and the sources and methods of selection of participants. Describe methods of follow-up<br><i>Case-control study</i> —Give the eligibility criteria, and the sources and methods of case ascertainment and control selection. Give the rationale for the choice of cases and controls<br><input type="checkbox"/> <i>Cross-sectional study</i> —Give the eligibility criteria, and the sources and methods of selection of participants <i>Page 6, page 7</i><br>(b) <i>Cohort study</i> —For matched studies, give matching criteria and number of exposed and unexposed<br><i>Case-control study</i> —For matched studies, give matching criteria and the number of controls per case |
| Variables                                        | 7       | Clearly define all outcomes, exposures, predictors, potential confounders, and effect modifiers. Give diagnostic criteria, if applicable <i>Page 6, page 7</i>                                                                                                                                                                                                                                                                                                                                                                                                                                                                                                                                                                                  |
| Data sources/measurement                         | 8*      | For each variable of interest, give sources of data and details of methods of assessment (measurement). Describe comparability of assessment methods if there is more than one group <i>Page 7, page 8</i>                                                                                                                                                                                                                                                                                                                                                                                                                                                                                                                                      |
| Bias                                             | 9       | Describe any efforts to address potential sources of bias<br><i>No potential sources of bias identified</i>                                                                                                                                                                                                                                                                                                                                                                                                                                                                                                                                                                                                                                     |
| Study size                                       | 10      | Explain how the study size was arrived at <i>Page 6, page 7</i>                                                                                                                                                                                                                                                                                                                                                                                                                                                                                                                                                                                                                                                                                 |
| Quantitative variables                           | 11      | Explain how quantitative variables were handled in the analyses. If applicable, describe which groupings were chosen and why <i>Page 7, page 8</i>                                                                                                                                                                                                                                                                                                                                                                                                                                                                                                                                                                                              |
| ( <input type="checkbox"/> ) Statistical methods | 12      | (a) Describe all statistical methods, including those used to control for confounding <i>Page 8</i><br>(b) Describe any methods used to examine subgroups and interactions <i>Page 8</i><br>(c) Explain how missing data were addressed <i>Page 8</i><br>(d) <i>Cohort study</i> —If applicable, explain how loss to follow-up was addressed<br><i>Case-control study</i> —If applicable, explain how matching of cases and controls was addressed<br><i>Cross-sectional study</i> —If applicable, describe analytical methods taking account of sampling strategy <i>N.A</i><br>(e) Describe any sensitivity analyses <i>N.A</i>                                                                                                               |

**Results**

|                                           |     |                                                                                                                                                                                                                                                                    |
|-------------------------------------------|-----|--------------------------------------------------------------------------------------------------------------------------------------------------------------------------------------------------------------------------------------------------------------------|
| <input type="checkbox"/> Participants     | 13* | (a) Report numbers of individuals at each stage of study—eg numbers potentially eligible, examined for eligibility, confirmed eligible, included in the study, completing follow-up, and analysed <b>Page 9</b>                                                    |
|                                           |     | (b) Give reasons for non-participation at each stage <b>Page 9</b>                                                                                                                                                                                                 |
|                                           |     | (c) Consider use of a flow diagram                                                                                                                                                                                                                                 |
| <input type="checkbox"/> Descriptive data | 14* | (a) Give characteristics of study participants (eg demographic, clinical, social) and information on exposures and potential confounders <b>Page 9 and Table 1</b>                                                                                                 |
|                                           |     | (b) Indicate number of participants with missing data for each variable of interest <b>Table 1 footnotes</b>                                                                                                                                                       |
|                                           |     | (c) <i>Cohort study</i> —Summarise follow-up time (eg, average and total amount)                                                                                                                                                                                   |
| <input type="checkbox"/> Outcome data     | 15* | <i>Cohort study</i> —Report numbers of outcome events or summary measures over time                                                                                                                                                                                |
|                                           |     | <i>Case-control study</i> —Report numbers in each exposure category, or summary measures of exposure                                                                                                                                                               |
|                                           |     | <i>Cross-sectional study</i> —Report numbers of outcome events or summary measures <b>Table 1</b>                                                                                                                                                                  |
| <input type="checkbox"/> Main results     | 16  | (a) Give unadjusted estimates and, if applicable, confounder-adjusted estimates and their precision (eg, 95% confidence interval). Make clear which confounders were adjusted for and why they were included <b>Page 9, page 10 and Table 2, Table 3 footnotes</b> |
|                                           |     | (b) Report category boundaries when continuous variables were categorized <b>Table 2 and Table 3 footnote</b>                                                                                                                                                      |
|                                           |     | (c) If relevant, consider translating estimates of relative risk into absolute risk for a meaningful time period <b>N.A</b>                                                                                                                                        |
| <input type="checkbox"/> Other analyses   | 17  | Report other analyses done—eg analyses of subgroups and interactions, and sensitivity analyses <b>Page 9, page 10</b>                                                                                                                                              |

**Discussion**

|                                           |    |                                                                                                                                                                                                             |
|-------------------------------------------|----|-------------------------------------------------------------------------------------------------------------------------------------------------------------------------------------------------------------|
| <input type="checkbox"/> Key results      | 18 | Summarise key results with reference to study objectives <b>Page 11</b>                                                                                                                                     |
| <input type="checkbox"/> Limitations      | 19 | Discuss limitations of the study, taking into account sources of potential bias or imprecision. Discuss both direction and magnitude of any potential bias <b>Page 12</b>                                   |
| <input type="checkbox"/> Interpretation   | 20 | Give a cautious overall interpretation of results considering objectives, limitations, multiplicity of analyses, results from similar studies, and other relevant evidence <b>Page 11, page 12, page 13</b> |
| <input type="checkbox"/> Generalisability | 21 | Discuss the generalisability (external validity) of the study results <b>Page 13</b>                                                                                                                        |

**Other information**

|                                  |    |                                                                                                                                                                              |
|----------------------------------|----|------------------------------------------------------------------------------------------------------------------------------------------------------------------------------|
| <input type="checkbox"/> Funding | 22 | Give the source of funding and the role of the funders for the present study and, if applicable, for the original study on which the present article is based <b>Page 14</b> |
|----------------------------------|----|------------------------------------------------------------------------------------------------------------------------------------------------------------------------------|

\*Give information separately for cases and controls in case-control studies and, if applicable, for exposed and unexposed groups in cohort and cross-sectional studies.

**Note:** An Explanation and Elaboration article discusses each checklist item and gives methodological background and published examples of transparent reporting. The STROBE checklist is best used in conjunction with this article (freely available on the Web sites of PLoS Medicine at <http://www.plosmedicine.org/>, Annals of Internal Medicine at <http://www.annals.org/>, and Epidemiology at <http://www.epidem.com/>). Information on the STROBE Initiative is available at [www.strobe-statement.org](http://www.strobe-statement.org).
